# Supplementary material for: Immediate pools of malaria infections at diagnosis combined with targeted deep sequencing accurately quantifies frequency of drug resistance mutations
Source: PeerJ. 2021 Nov 9;9:e11794. doi: 10.7717/peerj.11794 (PMC8588852; doi:10.7717/peerj.11794)
Supplement: Supplemental Information 1 [file peerj-09-11794-s001.xlsx]

## Sheet: Sheet1
Supplementary Table 1. Read counts for each pool and individual samples
Genotype and Prevalence calls based on minimum 2 UMI count and 10 UMI coverage.
Data Colum Keys
Count	UMI count supporting the variant call.
Coverage	UMI coverage at the locus
Frequency	Within sample allele frequency of the variant (count/coverage)
Genotype	Genotype call. 0: WT, 1: Mixed, 2: Mutant
Prevalence	1 for mutant ant mixed samples, 0 for WT.
Gene ID	PF3D7_0417200	PF3D7_0417200	PF3D7_0417200	PF3D7_0417200	PF3D7_0417200	PF3D7_0417200	PF3D7_0417200	PF3D7_0417200	PF3D7_0417200	PF3D7_0417200	PF3D7_0417200	PF3D7_0417200	PF3D7_0417200	PF3D7_0417200	PF3D7_0417200	PF3D7_0417200	PF3D7_0417200	PF3D7_0417200	PF3D7_0417200	PF3D7_0417200	PF3D7_0417200	PF3D7_0417200	PF3D7_0417200	PF3D7_0417200	PF3D7_0417200	PF3D7_0417200	PF3D7_0417200	PF3D7_0417200	PF3D7_0417200	PF3D7_0417200	PF3D7_0523000	PF3D7_0523000	PF3D7_0523000	PF3D7_0523000	PF3D7_0523000	PF3D7_0523000	PF3D7_0523000	PF3D7_0523000	PF3D7_0523000	PF3D7_0523000	PF3D7_0523000	PF3D7_0523000	PF3D7_0523000	PF3D7_0523000	PF3D7_0523000	PF3D7_0523000	PF3D7_0523000	PF3D7_0523000	PF3D7_0523000
Gene	dhfr-ts	dhfr-ts	dhfr-ts	dhfr-ts	dhfr-ts	dhfr-ts	dhfr-ts	dhfr-ts	dhfr-ts	dhfr-ts	dhfr-ts	dhfr-ts	dhfr-ts	dhfr-ts	dhfr-ts	dhfr-ts	dhfr-ts	dhfr-ts	dhfr-ts	dhfr-ts	dhfr-ts	dhfr-ts	dhfr-ts	dhfr-ts	dhfr-ts	dhfr-ts	dhfr-ts	dhfr-ts	dhfr-ts	dhfr-ts	mdr1	mdr1	mdr1	mdr1	mdr1	mdr1	mdr1	mdr1	mdr1	mdr1	mdr1	mdr1	mdr1	mdr1	mdr1	mdr1	mdr1	mdr1	mdr1
Mutation Name	dhfr-ts-Ala16Val	dhfr-ts-Ala16Val	dhfr-ts-Ala16Val	dhfr-ts-Ala16Val	dhfr-ts-Ala16Val	dhfr-ts-Asn51Ile	dhfr-ts-Asn51Ile	dhfr-ts-Asn51Ile	dhfr-ts-Asn51Ile	dhfr-ts-Asn51Ile	dhfr-ts-Cys59Arg	dhfr-ts-Cys59Arg	dhfr-ts-Cys59Arg	dhfr-ts-Cys59Arg	dhfr-ts-Cys59Arg	dhfr-ts-Ile164Leu	dhfr-ts-Ile164Leu	dhfr-ts-Ile164Leu	dhfr-ts-Ile164Leu	dhfr-ts-Ile164Leu	dhfr-ts-Ser108Asn	dhfr-ts-Ser108Asn	dhfr-ts-Ser108Asn	dhfr-ts-Ser108Asn	dhfr-ts-Ser108Asn	dhfr-ts-Ser108Thr	dhfr-ts-Ser108Thr	dhfr-ts-Ser108Thr	dhfr-ts-Ser108Thr	dhfr-ts-Ser108Thr	mdr1-Ala1158Gly	mdr1-Ala1158Gly	mdr1-Ala1158Gly	mdr1-Ala1158Gly	mdr1-Ala1158Gly	mdr1-Ala1158fs	mdr1-Ala1158fs	mdr1-Ala1158fs	mdr1-Ala1158fs	mdr1-Ala1158fs	mdr1-Asn1042Asp	mdr1-Asn1042Asp	mdr1-Asn1042Asp	mdr1-Asn1042Asp	mdr1-Asn1042Asp	mdr1-Asn1215Asn	mdr1-Asn1215Asn	mdr1-Asn1215Asn	mdr1-Asn1215Asn
ExonicFunc	missense_variant	missense_variant	missense_variant	missense_variant	missense_variant	missense_variant	missense_variant	missense_variant	missense_variant	missense_variant	missense_variant	missense_variant	missense_variant	missense_variant	missense_variant	missense_variant	missense_variant	missense_variant	missense_variant	missense_variant	missense_variant	missense_variant	missense_variant	missense_variant	missense_variant	missense_variant	missense_variant	missense_variant	missense_variant	missense_variant	missense_variant	missense_variant	missense_variant	missense_variant	missense_variant	frameshift_variant	frameshift_variant	frameshift_variant	frameshift_variant	frameshift_variant	missense_variant	missense_variant	missense_variant	missense_variant	missense_variant	synonymous_variant	synonymous_variant	synonymous_variant	synonymous_variant
AA Change	Ala16Val	Ala16Val	Ala16Val	Ala16Val	Ala16Val	Asn51Ile	Asn51Ile	Asn51Ile	Asn51Ile	Asn51Ile	Cys59Arg	Cys59Arg	Cys59Arg	Cys59Arg	Cys59Arg	Ile164Leu	Ile164Leu	Ile164Leu	Ile164Leu	Ile164Leu	Ser108Asn	Ser108Asn	Ser108Asn	Ser108Asn	Ser108Asn	Ser108Thr	Ser108Thr	Ser108Thr	Ser108Thr	Ser108Thr	Ala1158Gly	Ala1158Gly	Ala1158Gly	Ala1158Gly	Ala1158Gly	Ala1158fs	Ala1158fs	Ala1158fs	Ala1158fs	Ala1158fs	Asn1042Asp	Asn1042Asp	Asn1042Asp	Asn1042Asp	Asn1042Asp	Asn1215Asn	Asn1215Asn	Asn1215Asn	Asn1215Asn
Targeted	Yes	Yes	Yes	Yes	Yes	Yes	Yes	Yes	Yes	Yes	Yes	Yes	Yes	Yes	Yes	Yes	Yes	Yes	Yes	Yes	Yes	Yes	Yes	Yes	Yes	Yes	Yes	Yes	Yes	Yes	No	No	No	No	No	No	No	No	No	No	Yes	Yes	Yes	Yes	Yes	No	No	No	No
Data	Count	Coverage	Frequency	Genotype	Prevalence	Count	Coverage	Frequency	Genotype	Prevalence	Count	Coverage	Frequency	Genotype	Prevalence	Count	Coverage	Frequency	Genotype	Prevalence	Count	Coverage	Frequency	Genotype	Prevalence	Count	Coverage	Frequency	Genotype	Prevalence	Count	Coverage	Frequency	Genotype	Prevalence	Count	Coverage	Frequency	Genotype	Prevalence	Count	Coverage	Frequency	Genotype	Prevalence	Count	Coverage	Frequency	Genotype
Sample ID
10GHR66017-AG-1	0	602	0	0	0	848	848	1	2	1	848	848	1	2	1	0	78	0	0	0	926	926	1	2	1	0	926	0	0	0	0	373	0	0	0	1	373	0	0	0	0	258	0	0	0	0	115	0	0
10GHR66030-AG-1	0	1139	0	0	0	1454	1454	1	2	1	1454	1454	1	2	1	0	109	0	0	0	1562	1563	0	1	1	0	1563	0	0	0	0	683	0	0	0	0	683	0	0	0	0	450	0	0	0	0	233	0	0
10GHR66031-AG-1	0	276	0	0	0	410	410	1	2	1	410	410	1	2	1	0	37	0	0	0	447	447	1	2	1	0	447	0	0	0	0	200	0	0	0	0	200	0	0	0	0	141	0	0	0	0	59	0	0
10GHR66032-AG-1	0	423	0	0	0	538	538	1	2	1	538	538	1	2	1	0	74	0	0	0	612	612	1	2	1	0	612	0	0	0	0	452	0	0	0	0	452	0	0	0	0	318	0	0	0	0	134	0	0
10GHR66033-AG-1	0	1147	0	0	0	1426	1426	1	2	1	1426	1426	1	2	1	0	109	0	0	0	1535	1535	1	2	1	0	1535	0	0	0	0	693	0	0	0	0	693	0	0	0	0	444	0	0	0	0	249	0	0
10GHR66034-AG-1	0	2327	0	0	0	3327	3327	1	2	1	3327	3327	1	2	1	0	243	0	0	0	3570	3570	1	2	1	0	3570	0	0	0	0	1542	0	0	0	1	1542	0	0	0	0	1056	0	0	0	0	486	0	0
10GHR66037-AG-1	0	914	0	0	0	0	1572	0	0	0	1572	1572	1	2	1	0	16	0	0	0	1588	1588	1	2	1	0	1588	0	0	0	0	504	0	0	0	0	504	0	0	0	0	421	0	0	0	0	83	0	0
10GHR66038-AG-1	0	441	0	0	0	634	634	1	2	1	634	634	1	2	1	0	45	0	0	0	679	679	1	2	1	0	679	0	0	0	0	262	0	0	0	0	262	0	0	0	0	182	0	0	0	0	80	0	0
10GHR66039-AG-1	0	2702	0	0	0	3785	3785	1	2	1	3785	3785	1	2	1	0	290	0	0	0	4075	4075	1	2	1	0	4075	0	0	0	0	1710	0	0	0	0	1710	0	0	0	0	1158	0	0	0	0	552	0	0
10GHR66040-AG-1	0	1400	0	0	0	947	1868	0	1	1	947	1868	0	1	1	0	140	0	0	0	1010	2008	0	1	1	0	2008	0	0	0	0	942	0	0	0	2	942	0	1	1	0	640	0	0	0	0	302	0	0
10GHR66043-AG-1	0	635	0	0	0	887	887	1	2	1	887	887	1	2	1	0	54	0	0	0	941	941	1	2	1	0	941	0	0	0	0	434	0	0	0	0	434	0	0	0	0	304	0	0	0	0	130	0	0
10GHR66045-AG-1	0	175	0	0	0	212	212	1	2	1	212	212	1	2	1	0	17	0	0	0	229	229	1	2	1	0	229	0	0	0	0	110	0	0	0	0	110	0	0	0	0	98	0	0	0	0	12	0	0
10GHR66046-AG-1	0	682	0	0	0	981	981	1	2	1	981	981	1	2	1	0	63	0	0	0	1044	1044	1	2	1	0	1044	0	0	0	0	437	0	0	0	0	437	0	0	0	0	301	0	0	0	0	136	0	0
10GHR66049-AG-1	0	29	0	0	0	43	43	1	2	1	43	43	1	2	1	0	2	0	NA	NA	45	45	1	2	1	0	45	0	0	0	0	18	0	0	0	0	18	0	0	0	0	14	0	0	0	0	4	0	NA
10GHR66051-AG-1	0	0	NA	NA	NA	1	1	1	NA	NA	1	1	1	NA	NA	0	0	NA	NA	NA	1	1	1	NA	NA	0	1	0	NA	NA	0	0	NA	NA	NA	0	0	NA	NA	NA	0	0	NA	NA	NA	0	0	NA	NA
10GHR66052-AG-1	0	289	0	0	0	407	407	1	2	1	407	407	1	2	1	0	26	0	0	0	433	433	1	2	1	0	433	0	0	0	0	166	0	0	0	0	166	0	0	0	0	118	0	0	0	0	48	0	0
10GHR66053-AG-1	0	407	0	0	0	615	615	1	2	1	615	615	1	2	1	0	29	0	0	0	644	644	1	2	1	0	644	0	0	0	0	259	0	0	0	0	259	0	0	0	0	181	0	0	0	0	78	0	0
10GHR66054-AG-1	0	56	0	0	0	88	88	1	2	1	88	88	1	2	1	0	8	0	NA	NA	96	96	1	2	1	0	96	0	0	0	0	41	0	0	0	0	41	0	0	0	0	25	0	0	0	0	16	0	0
10GHR66055-AG-1	0	0	NA	NA	NA	0	0	NA	NA	NA	0	0	NA	NA	NA	0	0	NA	NA	NA	0	0	NA	NA	NA	0	0	NA	NA	NA	0	0	NA	NA	NA	0	0	NA	NA	NA	0	0	NA	NA	NA	0	0	NA	NA
10GHR66056-AG-1	0	6	0	NA	NA	7	7	1	NA	NA	7	7	1	NA	NA	0	0	NA	NA	NA	7	7	1	NA	NA	0	7	0	NA	NA	0	1	0	NA	NA	0	1	0	NA	NA	0	0	NA	NA	NA	0	1	0	NA
10GHR66057-AG-1	0	3	0	NA	NA	3	3	1	NA	NA	3	3	1	NA	NA	0	0	NA	NA	NA	3	3	1	NA	NA	0	3	0	NA	NA	0	0	NA	NA	NA	0	0	NA	NA	NA	0	0	NA	NA	NA	0	0	NA	NA
10GHR66058-AG-1	0	487	0	0	0	688	688	1	2	1	688	688	1	2	1	0	46	0	0	0	734	734	1	2	1	0	734	0	0	0	0	315	0	0	0	0	315	0	0	0	0	206	0	0	0	0	109	0	0
10GHR66059-AG-1	0	319	0	0	0	556	556	1	2	1	556	556	1	2	1	0	36	0	0	0	592	592	1	2	1	0	592	0	0	0	0	342	0	0	0	0	342	0	0	0	0	215	0	0	0	0	127	0	0
10GHR66060-AG-1	0	319	0	0	0	393	393	1	2	1	393	393	1	2	1	0	30	0	0	0	423	423	1	2	1	0	423	0	0	0	0	202	0	0	0	0	202	0	0	0	0	131	0	0	0	0	71	0	0
10GHR66061-AG-1	0	156	0	0	0	202	202	1	2	1	202	202	1	2	1	0	20	0	0	0	222	222	1	2	1	0	222	0	0	0	0	98	0	0	0	0	98	0	0	0	0	63	0	0	0	0	35	0	0
10GHR66062-AG-1	0	285	0	0	0	403	403	1	2	1	403	403	1	2	1	0	39	0	0	0	442	442	1	2	1	0	442	0	0	0	0	151	0	0	0	0	151	0	0	0	0	118	0	0	0	0	33	0	0
10GHR66063-AG-1	0	85	0	0	0	122	122	1	2	1	122	122	1	2	1	0	8	0	NA	NA	130	130	1	2	1	0	130	0	0	0	0	43	0	0	0	0	43	0	0	0	0	28	0	0	0	0	15	0	0
10GHR66064-AG-1	0	0	NA	NA	NA	1	1	1	NA	NA	1	1	1	NA	NA	0	0	NA	NA	NA	1	1	1	NA	NA	0	1	0	NA	NA	0	0	NA	NA	NA	0	0	NA	NA	NA	0	0	NA	NA	NA	0	0	NA	NA
10GHR66065-AG-1	0	70	0	0	0	102	102	1	2	1	102	102	1	2	1	0	9	0	NA	NA	111	111	1	2	1	0	111	0	0	0	0	46	0	0	0	0	46	0	0	0	0	29	0	0	0	0	17	0	0
10GHR66066-AG-1	0	220	0	0	0	310	310	1	2	1	310	310	1	2	1	0	20	0	0	0	330	330	1	2	1	0	330	0	0	0	0	130	0	0	0	0	130	0	0	0	0	88	0	0	0	0	42	0	0
10GHR66067-AG-1	0	0	NA	NA	NA	1	1	1	NA	NA	1	1	1	NA	NA	0	0	NA	NA	NA	1	1	1	NA	NA	0	1	0	NA	NA	0	0	NA	NA	NA	0	0	NA	NA	NA	0	0	NA	NA	NA	0	0	NA	NA
10GHR66068-AG-1	0	0	NA	NA	NA	0	0	NA	NA	NA	0	0	NA	NA	NA	0	0	NA	NA	NA	0	0	NA	NA	NA	0	0	NA	NA	NA	0	0	NA	NA	NA	0	0	NA	NA	NA	0	0	NA	NA	NA	0	0	NA	NA
10GHR66069-AG-1	0	1274	0	0	0	1680	1680	1	2	1	0	1680	0	0	0	0	123	0	0	0	1802	1803	0	1	1	0	1803	0	0	0	0	701	0	0	0	0	701	0	0	0	0	491	0	0	0	0	210	0	0
10GHR66070-AG-1	0	43	0	0	0	66	66	1	2	1	66	66	1	2	1	0	6	0	NA	NA	72	72	1	2	1	0	72	0	0	0	0	47	0	0	0	0	47	0	0	0	0	31	0	0	0	0	16	0	0
10GHR66071-AG-1	0	322	0	0	0	573	573	1	2	1	573	573	1	2	1	0	30	0	0	0	603	603	1	2	1	0	603	0	0	0	0	352	0	0	0	0	352	0	0	0	0	214	0	0	0	0	138	0	0
10GHR66072-AG-1	0	741	0	0	0	1097	1097	1	2	1	1097	1097	1	2	1	0	106	0	0	0	1203	1203	1	2	1	0	1203	0	0	0	0	489	0	0	0	1	489	0	0	0	0	342	0	0	0	0	147	0	0
10GHR66074-AG-1	0	38	0	0	0	0	44	0	0	0	44	44	1	2	1	0	3	0	NA	NA	47	47	1	2	1	0	47	0	0	0	0	24	0	0	0	0	24	0	0	0	0	14	0	0	0	0	10	0	0
10GHR66076-AG-1	0	174	0	0	0	236	236	1	2	1	236	236	1	2	1	0	21	0	0	0	257	257	1	2	1	0	257	0	0	0	0	94	0	0	0	0	94	0	0	0	0	67	0	0	0	0	27	0	0
10GHR66077-AG-1	0	28	0	0	0	32	32	1	2	1	32	32	1	2	1	0	1	0	NA	NA	33	33	1	2	1	0	33	0	0	0	0	12	0	0	0	0	12	0	0	0	0	6	0	NA	NA	0	6	0	NA
10GHR66079-AG-1	0	2	0	NA	NA	3	3	1	NA	NA	3	3	1	NA	NA	0	0	NA	NA	NA	3	3	1	NA	NA	0	3	0	NA	NA	0	2	0	NA	NA	0	2	0	NA	NA	0	2	0	NA	NA	0	0	NA	NA
10GHR66080-AG-1	0	62	0	0	0	86	86	1	2	1	86	86	1	2	1	0	12	0	0	0	98	98	1	2	1	0	98	0	0	0	0	42	0	0	0	0	42	0	0	0	0	27	0	0	0	0	15	0	0
10GHR66082-AG-1	0	107	0	0	0	0	135	0	0	0	135	135	1	2	1	0	14	0	0	0	149	149	1	2	1	0	149	0	0	0	0	80	0	0	0	0	80	0	0	0	0	55	0	0	0	0	25	0	0
10GHR66085-AG-1	0	85	0	0	0	35	106	0	1	1	35	106	0	1	1	0	8	0	NA	NA	38	114	0	1	1	0	114	0	0	0	0	54	0	0	0	0	54	0	0	0	0	39	0	0	0	0	15	0	0
10GHR66086-AG-1	0	0	NA	NA	NA	0	0	NA	NA	NA	0	0	NA	NA	NA	0	0	NA	NA	NA	0	0	NA	NA	NA	0	0	NA	NA	NA	0	0	NA	NA	NA	0	0	NA	NA	NA	0	0	NA	NA	NA	0	0	NA	NA
10GHR66087-AG-1	0	88	0	0	0	125	125	1	2	1	125	125	1	2	1	0	13	0	0	0	138	138	1	2	1	0	138	0	0	0	0	63	0	0	0	0	63	0	0	0	0	37	0	0	0	0	26	0	0
10GHR66088-AG-1	0	214	0	0	0	223	247	0	1	1	247	247	1	2	1	0	21	0	0	0	268	268	1	2	1	0	268	0	0	0	0	111	0	0	0	1	111	0	0	0	0	75	0	0	0	0	36	0	0
10GHR66090-AG-1	0	682	0	0	0	976	976	1	2	1	976	976	1	2	1	0	73	0	0	0	1049	1049	1	2	1	0	1049	0	0	0	19	395	0	1	1	1	395	0	0	0	0	263	0	0	0	0	132	0	0
10GHR66091-AG-1	0	1	0	NA	NA	1	1	1	NA	NA	1	1	1	NA	NA	0	0	NA	NA	NA	1	1	1	NA	NA	0	1	0	NA	NA	0	0	NA	NA	NA	0	0	NA	NA	NA	0	0	NA	NA	NA	0	0	NA	NA
10GHR66092-AG-1	0	153	0	0	0	184	184	1	2	1	184	184	1	2	1	0	12	0	0	0	196	196	1	2	1	0	196	0	0	0	0	70	0	0	0	0	70	0	0	0	0	51	0	0	0	0	19	0	0
10GHR66093-AG-1	0	73	0	0	0	0	79	0	0	0	79	79	1	2	1	0	0	NA	NA	NA	79	79	1	2	1	0	79	0	0	0	0	36	0	0	0	0	36	0	0	0	0	23	0	0	0	0	13	0	0
10GHR66094-AG-1	0	0	NA	NA	NA	0	0	NA	NA	NA	0	0	NA	NA	NA	0	0	NA	NA	NA	0	0	NA	NA	NA	0	0	NA	NA	NA	0	1	0	NA	NA	0	1	0	NA	NA	0	0	NA	NA	NA	0	1	0	NA
10GHR66096-AG-1	0	111	0	0	0	133	133	1	2	1	133	133	1	2	1	0	6	0	NA	NA	139	139	1	2	1	0	139	0	0	0	0	56	0	0	0	0	56	0	0	0	0	35	0	0	0	0	21	0	0
10GHR66097-AG-1	0	11	0	0	0	15	15	1	2	1	15	15	1	2	1	0	0	NA	NA	NA	15	15	1	2	1	0	15	0	0	0	0	6	0	NA	NA	0	6	0	NA	NA	0	4	0	NA	NA	0	2	0	NA
10GHR66098-AG-1	0	478	0	0	0	499	656	0	1	1	656	656	1	2	1	0	38	0	0	0	694	694	1	2	1	0	694	0	0	0	0	288	0	0	0	0	288	0	0	0	0	193	0	0	0	0	95	0	0
10GHR66099-AG-1	0	579	0	0	0	977	977	1	2	1	977	977	1	2	1	0	56	0	0	0	1033	1033	1	2	1	0	1033	0	0	0	0	568	0	0	0	0	568	0	0	0	0	375	0	0	0	0	193	0	0
10GHR66101-AG-1	0	1	0	NA	NA	1	1	1	NA	NA	1	1	1	NA	NA	0	0	NA	NA	NA	1	1	1	NA	NA	0	1	0	NA	NA	0	0	NA	NA	NA	0	0	NA	NA	NA	0	0	NA	NA	NA	0	0	NA	NA
10GHR66102-AG-1	0	35	0	0	0	65	65	1	2	1	65	65	1	2	1	0	4	0	NA	NA	69	69	1	2	1	0	69	0	0	0	0	55	0	0	0	0	55	0	0	0	0	31	0	0	0	0	24	0	0
10GHR66103-AG-1	0	111	0	0	0	223	223	1	2	1	223	223	1	2	1	0	4	0	NA	NA	227	227	1	2	1	0	227	0	0	0	0	84	0	0	0	0	84	0	0	0	0	62	0	0	0	0	22	0	0
10GHR66104-AG-1	0	15	0	0	0	23	23	1	2	1	23	23	1	2	1	0	1	0	NA	NA	24	24	1	2	1	0	24	0	0	0	0	9	0	NA	NA	0	9	0	NA	NA	0	8	0	NA	NA	0	1	0	NA
10GHR66105-AG-1	0	18	0	0	0	25	25	1	2	1	25	25	1	2	1	0	0	NA	NA	NA	25	25	1	2	1	0	25	0	0	0	0	14	0	0	0	0	14	0	0	0	0	11	0	0	0	0	3	0	NA
10GHR66106-AG-1	0	86	0	0	0	0	108	0	0	0	0	108	0	0	0	0	10	0	0	0	0	118	0	0	0	0	118	0	0	0	0	53	0	0	0	0	53	0	0	0	0	41	0	0	0	0	12	0	0
10GHR66107-AG-1	0	0	NA	NA	NA	0	0	NA	NA	NA	0	0	NA	NA	NA	0	0	NA	NA	NA	0	0	NA	NA	NA	0	0	NA	NA	NA	0	2	0	NA	NA	0	2	0	NA	NA	0	1	0	NA	NA	0	1	0	NA
10GHR66108-AG-1	0	55	0	0	0	82	82	1	2	1	82	82	1	2	1	0	3	0	NA	NA	86	86	1	2	1	0	86	0	0	0	0	44	0	0	0	0	44	0	0	0	0	30	0	0	0	0	14	0	0
10GHR66109-AG-1	0	64	0	0	0	0	81	0	0	0	81	81	1	2	1	0	4	0	NA	NA	85	85	1	2	1	0	85	0	0	0	0	37	0	0	0	0	37	0	0	0	0	22	0	0	0	0	15	0	0
10GHR6650-AG-1	0	43	0	0	0	59	59	1	2	1	59	59	1	2	1	0	2	0	NA	NA	61	61	1	2	1	0	61	0	0	0	0	25	0	0	0	0	25	0	0	0	0	18	0	0	0	0	7	0	NA
10GR66084-AG-1	0	3121	0	0	0	4038	4038	1	2	1	4038	4038	1	2	1	0	291	0	0	0	4329	4329	1	2	1	0	4329	0	0	0	0	1773	0	0	0	3	1773	0	1	1	0	1212	0	0	0	0	561	0	0
CR01061101-AG-1	0	192	0	0	0	290	290	1	2	1	290	290	1	2	1	0	19	0	0	0	309	309	1	2	1	0	309	0	0	0	0	121	0	0	0	0	121	0	0	0	0	94	0	0	0	0	27	0	0
CR01061143-AG-1	0	421	0	0	0	561	562	0	1	1	561	562	0	1	1	0	25	0	0	0	586	587	0	1	1	0	587	0	0	0	0	235	0	0	0	0	235	0	0	0	0	166	0	0	0	0	69	0	0
CR0106978-AG-1	0	83	0	0	0	112	117	0	1	1	117	117	1	2	1	0	8	0	NA	NA	125	125	1	2	1	0	125	0	0	0	0	67	0	0	0	0	67	0	0	0	0	44	0	0	0	0	23	0	0
CR0107249-AG-1	0	0	NA	NA	NA	0	0	NA	NA	NA	0	0	NA	NA	NA	0	0	NA	NA	NA	0	0	NA	NA	NA	0	0	NA	NA	NA	0	0	NA	NA	NA	0	0	NA	NA	NA	0	0	NA	NA	NA	0	0	NA	NA
CR0107321-AG-1	0	5	0	NA	NA	9	9	1	NA	NA	0	9	0	NA	NA	0	0	NA	NA	NA	9	9	1	NA	NA	0	9	0	NA	NA	0	2	0	NA	NA	0	2	0	NA	NA	0	2	0	NA	NA	0	0	NA	NA
CR0107360-AG-1	0	4	0	NA	NA	6	6	1	NA	NA	6	6	1	NA	NA	0	1	0	NA	NA	7	7	1	NA	NA	0	7	0	NA	NA	0	6	0	NA	NA	0	6	0	NA	NA	0	3	0	NA	NA	0	3	0	NA
CR0107441-AG-1	0	2	0	NA	NA	2	2	1	NA	NA	2	2	1	NA	NA	0	1	0	NA	NA	2	3	0	NA	NA	0	3	0	NA	NA	0	0	NA	NA	NA	0	0	NA	NA	NA	0	0	NA	NA	NA	0	0	NA	NA
CR01A061047-AG-1	0	328	0	0	0	459	459	1	2	1	459	459	1	2	1	0	31	0	0	0	490	490	1	2	1	0	490	0	0	0	0	210	0	0	0	0	210	0	0	0	0	134	0	0	0	58	76	0	1
CR01A061062-AG-1	0	4	0	NA	NA	0	6	0	NA	NA	6	6	1	NA	NA	0	0	NA	NA	NA	6	6	1	NA	NA	0	6	0	NA	NA	0	4	0	NA	NA	0	4	0	NA	NA	0	2	0	NA	NA	0	2	0	NA
CR01A061146-AG-1	0	213	0	0	0	0	250	0	0	0	0	250	0	0	0	0	18	0	0	0	0	268	0	0	0	0	268	0	0	0	0	125	0	0	0	0	125	0	0	0	0	89	0	0	0	0	36	0	0
CR01A061218-AG-1	0	70	0	0	0	0	128	0	0	0	0	128	0	0	0	0	5	0	NA	NA	0	133	0	0	0	0	133	0	0	0	0	86	0	0	0	1	86	0	0	0	0	50	0	0	0	0	36	0	0
CR01A061302-AG-1	0	183	0	0	0	260	260	1	2	1	0	260	0	0	0	0	14	0	0	0	274	274	1	2	1	0	274	0	0	0	0	132	0	0	0	0	132	0	0	0	0	92	0	0	0	0	40	0	0
CR01A07063-AG-1	0	679	0	0	0	897	897	1	2	1	897	897	1	2	1	0	65	0	0	0	961	962	0	1	1	0	962	0	0	0	0	408	0	0	0	0	408	0	0	0	0	269	0	0	0	0	139	0	0
CR01A07258-AG-1	0	429	0	0	0	570	570	1	2	1	570	570	1	2	1	0	42	0	0	0	612	612	1	2	1	0	612	0	0	0	0	228	0	0	0	0	228	0	0	0	0	146	0	0	0	0	82	0	0
CR01A07285-AG-1	0	80	0	0	0	102	102	1	2	1	102	102	1	2	1	0	6	0	NA	NA	108	108	1	2	1	0	108	0	0	0	0	41	0	0	0	0	41	0	0	0	0	31	0	0	0	0	10	0	0
CR01A07291-AG-1	0	0	NA	NA	NA	0	0	NA	NA	NA	0	0	NA	NA	NA	0	0	NA	NA	NA	0	0	NA	NA	NA	0	0	NA	NA	NA	0	0	NA	NA	NA	0	0	NA	NA	NA	0	0	NA	NA	NA	0	0	NA	NA
CR01A07339-AG-1	0	345	0	0	0	521	521	1	2	1	521	521	1	2	1	0	34	0	0	0	555	555	1	2	1	0	555	0	0	0	0	216	0	0	0	0	216	0	0	0	0	146	0	0	0	0	70	0	0
CR01A07369-AG-1	0	607	0	0	0	0	770	0	0	0	770	770	1	2	1	0	68	0	0	0	838	838	1	2	1	0	838	0	0	0	0	384	0	0	0	0	384	0	0	0	0	260	0	0	0	0	124	0	0
CR01A07465-AG-1	0	253	0	0	0	301	301	1	2	1	301	301	1	2	1	0	26	0	0	0	327	327	1	2	1	0	327	0	0	0	0	152	0	0	0	0	152	0	0	0	0	98	0	0	0	0	54	0	0
CR01A07498-AG-1	0	21	0	0	0	41	41	1	2	1	41	41	1	2	1	0	2	0	NA	NA	43	43	1	2	1	0	43	0	0	0	0	29	0	0	0	0	29	0	0	0	0	16	0	0	0	0	13	0	0
CR01A07510-AG-1	0	1	0	NA	NA	3	3	1	NA	NA	3	3	1	NA	NA	0	1	0	NA	NA	4	4	1	NA	NA	0	4	0	NA	NA	0	3	0	NA	NA	0	3	0	NA	NA	0	3	0	NA	NA	0	0	NA	NA
CR01A07612-AG-1	0	26	0	0	0	33	33	1	2	1	33	33	1	2	1	0	7	0	NA	NA	40	40	1	2	1	0	40	0	0	0	0	9	0	NA	NA	0	9	0	NA	NA	0	5	0	NA	NA	0	4	0	NA
CR01A07624-AG-1	0	3	0	NA	NA	3	3	1	NA	NA	3	3	1	NA	NA	0	0	NA	NA	NA	3	3	1	NA	NA	0	3	0	NA	NA	0	4	0	NA	NA	0	4	0	NA	NA	0	1	0	NA	NA	0	3	0	NA
CR01A07711-AG-1	0	33	0	0	0	44	44	1	2	1	44	44	1	2	1	0	4	0	NA	NA	48	48	1	2	1	0	48	0	0	0	0	24	0	0	0	0	24	0	0	0	0	16	0	0	0	0	8	0	NA
PSER0106505-AG-1	0	266	0	0	0	370	370	1	2	1	370	370	1	2	1	0	30	0	0	0	400	400	1	2	1	0	400	0	0	0	0	194	0	0	0	0	194	0	0	0	0	146	0	0	0	0	48	0	0
PSER0106513-AG-1	0	0	NA	NA	NA	0	0	NA	NA	NA	0	0	NA	NA	NA	0	0	NA	NA	NA	0	0	NA	NA	NA	0	0	NA	NA	NA	0	0	NA	NA	NA	0	0	NA	NA	NA	0	0	NA	NA	NA	0	0	NA	NA
PSER0106514-AG-1	0	38	0	0	0	47	47	1	2	1	47	47	1	2	1	0	2	0	NA	NA	49	49	1	2	1	0	49	0	0	0	0	27	0	0	0	0	27	0	0	0	0	20	0	0	0	0	7	0	NA
PSER0106519-AG-1	0	186	0	0	0	241	241	1	2	1	241	241	1	2	1	0	17	0	0	0	258	258	1	2	1	0	258	0	0	0	0	91	0	0	0	0	91	0	0	0	0	61	0	0	0	0	30	0	0
PSER0106522-AG-1	0	38	0	0	0	52	52	1	2	1	52	52	1	2	1	0	1	0	NA	NA	53	53	1	2	1	0	53	0	0	0	0	26	0	0	0	0	26	0	0	0	0	19	0	0	0	0	7	0	NA
PSER0106528-AG-1	0	6	0	NA	NA	6	6	1	NA	NA	6	6	1	NA	NA	0	0	NA	NA	NA	6	6	1	NA	NA	0	6	0	NA	NA	0	0	NA	NA	NA	0	0	NA	NA	NA	0	0	NA	NA	NA	0	0	NA	NA
PSER0106540-AG-1	0	2	0	NA	NA	3	3	1	NA	NA	3	3	1	NA	NA	0	1	0	NA	NA	4	4	1	NA	NA	0	4	0	NA	NA	0	0	NA	NA	NA	0	0	NA	NA	NA	0	0	NA	NA	NA	0	0	NA	NA
PSER0106541-AG-1	0	438	0	0	0	603	603	1	2	1	603	603	1	2	1	0	28	0	0	0	631	631	1	2	1	0	631	0	0	0	0	263	0	0	0	0	263	0	0	0	0	187	0	0	0	0	76	0	0
PSER0106543-AG-1	0	244	0	0	0	329	333	0	1	1	333	333	1	2	1	0	21	0	0	0	354	354	1	2	1	0	354	0	0	0	0	127	0	0	0	0	127	0	0	0	0	83	0	0	0	0	44	0	0
PSER0106544-AG-1	0	758	0	0	0	0	951	0	0	0	951	951	1	2	1	0	89	0	0	0	1040	1040	1	2	1	0	1040	0	0	0	0	456	0	0	0	2	456	0	1	1	0	302	0	0	0	0	154	0	0
PSER0106545-AG-1	0	2	0	NA	NA	6	6	1	NA	NA	6	6	1	NA	NA	0	2	0	NA	NA	8	8	1	NA	NA	0	8	0	NA	NA	0	2	0	NA	NA	0	2	0	NA	NA	0	0	NA	NA	NA	0	2	0	NA
PSER0106546-AG-1	0	1	0	NA	NA	0	1	0	NA	NA	1	1	1	NA	NA	0	0	NA	NA	NA	1	1	1	NA	NA	0	1	0	NA	NA	0	0	NA	NA	NA	0	0	NA	NA	NA	0	0	NA	NA	NA	0	0	NA	NA
PSER0106550-AG-1	0	104	0	0	0	133	133	1	2	1	133	133	1	2	1	0	9	0	NA	NA	142	142	1	2	1	0	142	0	0	0	0	58	0	0	0	0	58	0	0	0	0	37	0	0	0	0	21	0	0
PSER0106563-AG-1	0	442	0	0	0	584	584	1	2	1	583	584	0	1	1	0	40	0	0	0	624	624	1	2	1	0	624	0	0	0	0	277	0	0	0	1	277	0	0	0	0	186	0	0	0	0	91	0	0
PSER0106567-AG-1	0	346	0	0	0	401	447	0	1	1	447	447	1	2	1	0	31	0	0	0	478	478	1	2	1	0	478	0	0	0	0	205	0	0	0	0	205	0	0	0	0	133	0	0	0	0	72	0	0
PSER0107024-AG-1	0	184	0	0	0	260	260	1	2	1	260	260	1	2	1	0	17	0	0	0	277	277	1	2	1	0	277	0	0	0	0	77	0	0	0	0	77	0	0	0	0	67	0	0	0	0	10	0	0
PSER0107038-AG-1	0	24	0	0	0	42	42	1	2	1	42	42	1	2	1	0	0	NA	NA	NA	42	42	1	2	1	0	42	0	0	0	0	20	0	0	0	0	20	0	0	0	0	14	0	0	0	0	6	0	NA
PSER0107040-AG-1	0	110	0	0	0	155	155	1	2	1	155	155	1	2	1	0	7	0	NA	NA	162	162	1	2	1	0	162	0	0	0	0	56	0	0	0	0	56	0	0	0	0	39	0	0	0	0	17	0	0
PSER0107062-AG-1	0	24	0	0	0	11	28	0	1	1	28	28	1	2	1	0	1	0	NA	NA	29	29	1	2	1	0	29	0	0	0	0	17	0	0	0	0	17	0	0	0	0	13	0	0	0	0	4	0	NA
PSER0107063-AG-1	0	100	0	0	0	145	145	1	2	1	145	145	1	2	1	0	6	0	NA	NA	151	151	1	2	1	0	151	0	0	0	0	66	0	0	0	0	66	0	0	0	0	44	0	0	0	0	22	0	0
PSER0107067-AG-1	0	62	0	0	0	67	70	0	1	1	70	70	1	2	1	0	9	0	NA	NA	79	79	1	2	1	0	79	0	0	0	0	49	0	0	0	0	49	0	0	0	0	36	0	0	0	0	13	0	0
PSER0107072-AG-1	0	1124	0	0	0	1565	1565	1	2	1	1565	1565	1	2	1	0	104	0	0	0	1669	1669	1	2	1	0	1669	0	0	0	0	695	0	0	0	1	695	0	0	0	0	492	0	0	0	0	203	0	0
PSER0107075-AG-1	0	70	0	0	0	85	85	1	2	1	85	85	1	2	1	0	3	0	NA	NA	88	88	1	2	1	0	88	0	0	0	0	43	0	0	0	0	43	0	0	0	0	28	0	0	0	0	15	0	0
PSER0107077-AG-1	0	240	0	0	0	315	315	1	2	1	315	315	1	2	1	0	20	0	0	0	335	335	1	2	1	0	335	0	0	0	0	159	0	0	0	0	159	0	0	0	0	110	0	0	0	0	49	0	0
PSER0107078-AG-1	0	2	0	NA	NA	2	2	1	NA	NA	2	2	1	NA	NA	0	1	0	NA	NA	3	3	1	NA	NA	0	3	0	NA	NA	0	0	NA	NA	NA	0	0	NA	NA	NA	0	0	NA	NA	NA	0	0	NA	NA
PSER0107080-AG-1	0	27	0	0	0	33	33	1	2	1	33	33	1	2	1	0	2	0	NA	NA	35	35	1	2	1	0	35	0	0	0	0	5	0	NA	NA	0	5	0	NA	NA	0	3	0	NA	NA	0	2	0	NA
PSER0107090-AG-1	0	2148	0	0	0	2894	2894	1	2	1	2894	2894	1	2	1	0	220	0	0	0	3114	3114	1	2	1	0	3114	0	0	0	0	1257	0	0	0	0	1257	0	0	0	0	891	0	0	0	0	366	0	0
PSER0107091-AG-1	0	58	0	0	0	75	75	1	2	1	75	75	1	2	1	0	6	0	NA	NA	81	81	1	2	1	0	81	0	0	0	0	17	0	0	0	0	17	0	0	0	0	11	0	0	0	0	6	0	NA
PSER0107092-AG-1	0	4	0	NA	NA	9	9	1	NA	NA	7	9	0	NA	NA	0	0	NA	NA	NA	9	9	1	NA	NA	0	9	0	NA	NA	0	3	0	NA	NA	0	3	0	NA	NA	0	0	NA	NA	NA	0	3	0	NA
PSER0107099-AG-1	0	0	NA	NA	NA	0	0	NA	NA	NA	0	0	NA	NA	NA	0	0	NA	NA	NA	0	0	NA	NA	NA	0	0	NA	NA	NA	0	0	NA	NA	NA	0	0	NA	NA	NA	0	0	NA	NA	NA	0	0	NA	NA
PSER0107104-AG-1	0	0	NA	NA	NA	0	0	NA	NA	NA	0	0	NA	NA	NA	0	0	NA	NA	NA	0	0	NA	NA	NA	0	0	NA	NA	NA	0	2	0	NA	NA	0	2	0	NA	NA	0	1	0	NA	NA	0	1	0	NA
PSER0107106-AG-1	0	35	0	0	0	0	38	0	0	0	38	38	1	2	1	0	2	0	NA	NA	40	40	1	2	1	0	40	0	0	0	0	23	0	0	0	0	23	0	0	0	0	19	0	0	0	0	4	0	NA
PSER0107107-AG-1	0	267	0	0	0	381	381	1	2	1	381	381	1	2	1	0	25	0	0	0	406	406	1	2	1	0	406	0	0	0	0	150	0	0	0	1	150	0	0	0	0	107	0	0	0	0	43	0	0
PSER0107130-AG-1	0	2	0	NA	NA	5	5	1	NA	NA	5	5	1	NA	NA	0	0	NA	NA	NA	5	5	1	NA	NA	0	5	0	NA	NA	0	1	0	NA	NA	0	1	0	NA	NA	0	1	0	NA	NA	0	0	NA	NA
PSER0107131-AG-1	0	5	0	NA	NA	6	6	1	NA	NA	6	6	1	NA	NA	0	0	NA	NA	NA	6	6	1	NA	NA	0	6	0	NA	NA	0	0	NA	NA	NA	0	0	NA	NA	NA	0	0	NA	NA	NA	0	0	NA	NA
PSER0107146-AG-1	0	911	0	0	0	1225	1225	1	2	1	1225	1225	1	2	1	0	79	0	0	0	1304	1304	1	2	1	0	1304	0	0	0	0	542	0	0	0	0	542	0	0	0	0	384	0	0	0	0	158	0	0
PSER0107148-AG-1	0	137	0	0	0	174	174	1	2	1	174	174	1	2	1	0	12	0	0	0	186	186	1	2	1	0	186	0	0	0	0	72	0	0	0	0	72	0	0	0	0	60	0	0	0	0	12	0	0
PSER0107149-AG-1	0	0	NA	NA	NA	0	0	NA	NA	NA	0	0	NA	NA	NA	0	0	NA	NA	NA	0	0	NA	NA	NA	0	0	NA	NA	NA	0	0	NA	NA	NA	0	0	NA	NA	NA	0	0	NA	NA	NA	0	0	NA	NA
PSER0107153-AG-1	0	16	0	0	0	19	19	1	2	1	19	19	1	2	1	0	3	0	NA	NA	22	22	1	2	1	0	22	0	0	0	0	9	0	NA	NA	0	9	0	NA	NA	0	7	0	NA	NA	0	2	0	NA
PSER0107154-AG-1	0	12	0	0	0	16	16	1	2	1	16	16	1	2	1	0	1	0	NA	NA	17	17	1	2	1	0	17	0	0	0	0	3	0	NA	NA	0	3	0	NA	NA	0	1	0	NA	NA	0	2	0	NA
PSER0107155-AG-1	0	0	NA	NA	NA	0	0	NA	NA	NA	0	0	NA	NA	NA	0	0	NA	NA	NA	0	0	NA	NA	NA	0	0	NA	NA	NA	0	0	NA	NA	NA	0	0	NA	NA	NA	0	0	NA	NA	NA	0	0	NA	NA
PSER0107156-AG-1	0	431	0	0	0	560	583	0	1	1	583	583	1	2	1	0	32	0	0	0	615	615	1	2	1	0	615	0	0	0	0	237	0	0	0	0	237	0	0	0	0	166	0	0	0	0	71	0	0
PSER0107157-AG-1	0	0	NA	NA	NA	0	0	NA	NA	NA	0	0	NA	NA	NA	0	0	NA	NA	NA	0	0	NA	NA	NA	0	0	NA	NA	NA	0	0	NA	NA	NA	0	0	NA	NA	NA	0	0	NA	NA	NA	0	0	NA	NA
PSER0107160-AG-1	0	11	0	0	0	13	13	1	2	1	13	13	1	2	1	0	1	0	NA	NA	14	14	1	2	1	0	14	0	0	0	0	7	0	NA	NA	0	7	0	NA	NA	0	6	0	NA	NA	0	1	0	NA
PSER0107166-AG-1	0	9	0	NA	NA	13	13	1	2	1	13	13	1	2	1	0	1	0	NA	NA	14	14	1	2	1	0	14	0	0	0	0	7	0	NA	NA	0	7	0	NA	NA	0	6	0	NA	NA	0	1	0	NA
PSER0107171-AG-1	0	304	0	0	0	394	394	1	2	1	394	394	1	2	1	0	32	0	0	0	426	426	1	2	1	0	426	0	0	0	0	138	0	0	0	0	138	0	0	0	0	86	0	0	0	0	52	0	0
PSER0107174-AG-1	0	482	0	0	0	609	609	1	2	1	609	609	1	2	1	0	48	0	0	0	657	657	1	2	1	0	657	0	0	0	0	264	0	0	0	0	264	0	0	0	0	196	0	0	0	0	68	0	0
PSER0107176-AG-1	0	160	0	0	0	232	232	1	2	1	232	232	1	2	1	0	19	0	0	0	251	251	1	2	1	0	251	0	0	0	0	119	0	0	0	0	119	0	0	0	0	83	0	0	0	0	36	0	0
PSER0107178-AG-1	0	0	NA	NA	NA	0	0	NA	NA	NA	0	0	NA	NA	NA	0	1	0	NA	NA	1	1	1	NA	NA	0	1	0	NA	NA	0	4	0	NA	NA	0	4	0	NA	NA	0	4	0	NA	NA	0	0	NA	NA
PSER0107180-AG-1	0	473	0	0	0	0	612	0	0	0	612	612	1	2	1	0	53	0	0	0	665	665	1	2	1	0	665	0	0	0	0	295	0	0	0	0	295	0	0	0	0	187	0	0	0	0	108	0	0
PSER0107186-AG-1	0	47	0	0	0	66	66	1	2	1	61	66	0	1	1	0	2	0	NA	NA	68	68	1	2	1	0	68	0	0	0	0	44	0	0	0	0	44	0	0	0	0	30	0	0	0	0	14	0	0
PSER0107188-AG-1	0	19	0	0	0	22	27	0	1	1	19	27	0	1	1	0	1	0	NA	NA	28	28	1	2	1	0	28	0	0	0	0	10	0	0	0	0	10	0	0	0	0	8	0	NA	NA	0	2	0	NA
PSER0107193-AG-1	0	381	0	0	0	29	487	0	1	1	487	487	1	2	1	0	30	0	0	0	517	517	1	2	1	0	517	0	0	0	0	215	0	0	0	0	215	0	0	0	0	151	0	0	0	0	64	0	0
PSER0107194-AG-1	0	1137	0	0	0	0	1434	0	0	0	1434	1434	1	2	1	0	132	0	0	0	1566	1566	1	2	1	0	1566	0	0	0	125	563	0	1	1	1	563	0	0	0	0	302	0	0	0	0	261	0	0
PSER0107201-AG-1	0	66	0	0	0	96	96	1	2	1	96	96	1	2	1	0	13	0	0	0	109	109	1	2	1	0	109	0	0	0	0	51	0	0	0	0	51	0	0	0	0	37	0	0	0	0	14	0	0
PSER0107202-AG-1	0	573	0	0	0	825	825	1	2	1	825	825	1	2	1	0	53	0	0	0	878	878	1	2	1	0	878	0	0	0	0	371	0	0	0	0	371	0	0	0	0	245	0	0	0	0	126	0	0
PSER0107203-AG-1	0	17	0	0	0	20	20	1	2	1	20	20	1	2	1	0	1	0	NA	NA	21	21	1	2	1	0	21	0	0	0	0	5	0	NA	NA	0	5	0	NA	NA	0	3	0	NA	NA	0	2	0	NA
PSER0107205-AG-1	0	28	0	0	0	33	33	1	2	1	33	33	1	2	1	0	2	0	NA	NA	35	35	1	2	1	0	35	0	0	0	0	15	0	0	0	0	15	0	0	0	0	13	0	0	0	0	2	0	NA
PSER0107210-AG-1	0	28	0	0	0	0	39	0	0	0	39	39	1	2	1	0	0	NA	NA	NA	39	39	1	2	1	0	39	0	0	0	0	1	0	NA	NA	0	1	0	NA	NA	0	1	0	NA	NA	0	0	NA	NA
PSER0107219-AG-1	0	11	0	0	0	11	11	1	2	1	11	11	1	2	1	0	0	NA	NA	NA	11	11	1	2	1	0	11	0	0	0	0	1	0	NA	NA	0	1	0	NA	NA	0	0	NA	NA	NA	0	1	0	NA
PSER0107221-AG-1	0	215	0	0	0	204	262	0	1	1	262	262	1	2	1	0	18	0	0	0	280	280	1	2	1	0	280	0	0	0	0	108	0	0	0	0	108	0	0	0	0	73	0	0	0	0	35	0	0
PSER0107225-AG-1	0	0	NA	NA	NA	0	0	NA	NA	NA	0	0	NA	NA	NA	0	0	NA	NA	NA	0	0	NA	NA	NA	0	0	NA	NA	NA	0	1	0	NA	NA	0	1	0	NA	NA	0	1	0	NA	NA	0	0	NA	NA
PSER0107227-AG-1	0	33	0	0	0	57	57	1	2	1	57	57	1	2	1	0	1	0	NA	NA	58	58	1	2	1	0	58	0	0	0	0	26	0	0	0	0	26	0	0	0	0	16	0	0	0	0	10	0	0
PSER0107235-AG-1	0	164	0	0	0	0	196	0	0	0	196	196	1	2	1	0	12	0	0	0	208	208	1	2	1	0	208	0	0	0	0	101	0	0	0	0	101	0	0	0	0	60	0	0	0	0	41	0	0
PSER0107236-AG-1	0	0	NA	NA	NA	0	0	NA	NA	NA	0	0	NA	NA	NA	0	0	NA	NA	NA	0	0	NA	NA	NA	0	0	NA	NA	NA	0	0	NA	NA	NA	0	0	NA	NA	NA	0	0	NA	NA	NA	0	0	NA	NA
PSER0107248-AG-1	0	130	0	0	0	153	153	1	2	1	153	153	1	2	1	0	8	0	NA	NA	161	161	1	2	1	0	161	0	0	0	0	68	0	0	0	0	68	0	0	0	0	53	0	0	0	0	15	0	0
PSER0107249-AG-1	0	121	0	0	0	163	163	1	2	1	163	163	1	2	1	0	11	0	0	0	174	174	1	2	1	0	174	0	0	0	0	68	0	0	0	0	68	0	0	0	0	41	0	0	0	0	27	0	0
PSER0107257-AG-1	0	126	0	0	0	153	153	1	2	1	153	153	1	2	1	0	13	0	0	0	166	166	1	2	1	0	166	0	0	0	0	57	0	0	0	0	57	0	0	0	0	33	0	0	0	0	24	0	0
PSER0107262-AG-1	0	63	0	0	0	86	101	0	1	1	101	101	1	2	1	0	5	0	NA	NA	106	106	1	2	1	0	106	0	0	0	0	61	0	0	0	0	61	0	0	0	0	41	0	0	0	0	20	0	0
PSER0107265-AG-1	0	0	NA	NA	NA	0	0	NA	NA	NA	0	0	NA	NA	NA	0	0	NA	NA	NA	0	0	NA	NA	NA	0	0	NA	NA	NA	0	0	NA	NA	NA	0	0	NA	NA	NA	0	0	NA	NA	NA	0	0	NA	NA
PSER0107270-AG-1	0	532	0	0	0	746	746	1	2	1	746	746	1	2	1	0	61	0	0	0	807	807	1	2	1	0	807	0	0	0	0	359	0	0	0	0	359	0	0	0	0	256	0	0	0	0	103	0	0
PSER0107271-AG-1	0	116	0	0	0	143	143	1	2	1	143	143	1	2	1	0	4	0	NA	NA	147	147	1	2	1	0	147	0	0	0	0	56	0	0	0	0	56	0	0	0	0	41	0	0	0	0	15	0	0
PSER0107280-AG-1	0	34	0	0	0	58	58	1	2	1	58	58	1	2	1	0	3	0	NA	NA	61	61	1	2	1	0	61	0	0	0	0	20	0	0	0	0	20	0	0	0	0	17	0	0	0	0	3	0	NA
PSER0107282-AG-1	0	0	NA	NA	NA	0	0	NA	NA	NA	0	0	NA	NA	NA	0	0	NA	NA	NA	0	0	NA	NA	NA	0	0	NA	NA	NA	0	0	NA	NA	NA	0	0	NA	NA	NA	0	0	NA	NA	NA	0	0	NA	NA
PSER0107283-AG-1	0	201	0	0	0	245	245	1	2	1	245	245	1	2	1	0	12	0	0	0	257	257	1	2	1	0	257	0	0	0	0	85	0	0	0	0	85	0	0	0	0	63	0	0	0	0	22	0	0
PSER0107289-AG-1	0	0	NA	NA	NA	0	0	NA	NA	NA	0	0	NA	NA	NA	0	0	NA	NA	NA	0	0	NA	NA	NA	0	0	NA	NA	NA	0	1	0	NA	NA	0	1	0	NA	NA	0	0	NA	NA	NA	0	1	0	NA
PSER0107305-AG-1	0	39	0	0	0	49	49	1	2	1	49	49	1	2	1	0	5	0	NA	NA	54	54	1	2	1	0	54	0	0	0	0	10	0	0	0	0	10	0	0	0	0	7	0	NA	NA	0	3	0	NA
PSER0107306-AG-1	0	203	0	0	0	278	278	1	2	1	278	278	1	2	1	0	17	0	0	0	295	295	1	2	1	0	295	0	0	0	0	122	0	0	0	0	122	0	0	0	0	88	0	0	0	0	34	0	0
PSER0107307-AG-1	0	1	0	NA	NA	2	2	1	NA	NA	2	2	1	NA	NA	0	0	NA	NA	NA	2	2	1	NA	NA	0	2	0	NA	NA	0	5	0	NA	NA	0	5	0	NA	NA	0	3	0	NA	NA	0	2	0	NA
PSER0107366-AG-1	0	159	0	0	0	0	198	0	0	0	198	198	1	2	1	0	18	0	0	0	216	216	1	2	1	0	216	0	0	0	0	89	0	0	0	1	89	0	0	0	0	61	0	0	0	0	28	0	0
PSER0107411-AG-1	0	125	0	0	0	149	158	0	1	1	158	158	1	2	1	0	13	0	0	0	171	171	1	2	1	0	171	0	0	0	0	59	0	0	0	0	59	0	0	0	0	37	0	0	0	0	22	0	0
PSER0107416-AG-1	0	850	0	0	0	1096	1096	1	2	1	1096	1096	1	2	1	0	93	0	0	0	1189	1189	1	2	1	0	1189	0	0	0	0	468	0	0	0	0	468	0	0	0	0	331	0	0	0	0	137	0	0
Cape Coast Pools	0	8177	0	0	0	8200	10049	0	1	1	9228	10049	0	1	1	0	459	0	0	0	10063	10508	0	1	1	0	10508	0	0	0	4	4493	0	1	1	1	4493	0	0	0	0	3021	0	0	0	0	1472	0	0
Begoro Pools	0	1924	0	0	0	1691	2346	0	1	1	2342	2346	0	1	1	0	75	0	0	0	2417	2420	0	1	1	2	2420	0	1	1	3	1112	0	1	1	1	1112	0	0	0	0	705	0	0	0	0	407	0	0
D6-AG-1	0	126	0	0	0	35	148	0	1	1	9	148	0	1	1	0	13	0	0	0	58	161	0	1	1	0	161	0	0	0	0	97	0	0	0	0	97	0	0	0	15	67	0	1	1	0	30	0	0
D6-AG-2	0	118	0	0	0	41	151	0	1	1	13	151	0	1	1	0	20	0	0	0	72	171	0	1	1	0	171	0	0	0	0	73	0	0	0	0	73	0	0	0	11	36	0	1	1	0	37	0	0
D6-AG-3	0	2	0	NA	NA	0	8	0	NA	NA	0	8	0	NA	NA	0	0	NA	NA	NA	1	8	0	NA	NA	0	8	0	NA	NA	0	0	NA	NA	NA	0	0	NA	NA	NA	0	0	NA	NA	NA	0	0	NA	NA
D6-AG-4	0	153	0	0	0	72	287	0	1	1	20	287	0	1	1	0	3	0	NA	NA	104	290	0	1	1	0	290	0	0	0	0	113	0	0	0	0	113	0	0	0	37	89	0	1	1	0	24	0	0
D6-AG-5	0	133	0	0	0	58	188	0	1	1	12	188	0	1	1	0	10	0	0	0	88	198	0	1	1	0	198	0	0	0	0	71	0	0	0	0	71	0	0	0	16	44	0	1	1	0	27	0	0
D6-AG-6	0	132	0	0	0	48	173	0	1	1	9	173	0	1	1	0	11	0	0	0	75	184	0	1	1	0	184	0	0	0	0	94	0	0	0	0	94	0	0	0	23	66	0	1	1	0	28	0	0
D10-AG-1	0	813	0	0	0	266	1024	0	1	1	66	1024	0	1	1	0	77	0	0	0	455	1101	0	1	1	0	1101	0	0	0	0	605	0	0	0	1	605	0	0	0	120	378	0	1	1	0	227	0	0
D10-AG-2	0	928	0	0	0	328	1141	0	1	1	91	1141	0	1	1	0	91	0	0	0	533	1232	0	1	1	0	1232	0	0	0	0	605	0	0	0	0	605	0	0	0	127	395	0	1	1	0	210	0	0
D10-AG-3	0	829	0	0	0	408	1269	0	1	1	106	1269	0	1	1	0	88	0	0	0	612	1357	0	1	1	0	1357	0	0	0	0	938	0	0	0	0	938	0	0	0	182	511	0	1	1	0	427	0	0
D10-AG-4	0	918	0	0	0	380	1684	0	1	1	98	1684	0	1	1	0	14	0	0	0	655	1698	0	1	1	0	1698	0	0	0	0	642	0	0	0	0	642	0	0	0	171	500	0	1	1	0	142	0	0
D10-AG-5	0	841	0	0	0	282	1048	0	1	1	69	1048	0	1	1	0	88	0	0	0	492	1136	0	1	1	0	1136	0	0	0	0	578	0	0	0	0	578	0	0	0	112	368	0	1	1	0	210	0	0
D10-AG-6	0	840	0	0	0	294	1065	0	1	1	79	1065	0	1	1	0	71	0	0	0	471	1136	0	1	1	0	1136	0	0	0	0	619	0	0	0	1	619	0	0	0	114	379	0	1	1	0	240	0	0
[truncated: 401 more columns]
