# Supplementary material for: Immediate pools of malaria infections at diagnosis combined with targeted deep sequencing accurately quantifies frequency of drug resistance mutations
Source: PeerJ. 2021 Nov 9;9:e11794. doi: 10.7717/peerj.11794 (PMC8588852; doi:10.7717/peerj.11794)
Supplement: Supplemental Information 2 [file peerj-09-11794-s002.xlsx]

## Sheet: Sheet1
Supplementary Table 2. UMI coverage per sample per MIP
MIP	crt_S0_Sub0_mip0	crt_S0_Sub0_mip1	crt_S0_Sub1_mip2	crt_S0_Sub1_mip3	crt_S0_Sub2_mip4	crt_S0_Sub2_mip5	crt_S0_Sub2_mip6	cytb_S0_Sub0_mip2	cytb_S0_Sub0_mip3	dhfr-ts_S0_Sub0_mip0	dhfr-ts_S0_Sub0_mip2	dhfr-ts_S0_Sub0_mip3	dhps_S0_Sub0_mip5	dhps_S0_Sub0_mip6	k13_S0_Sub0_mip0	k13_S0_Sub0_mip1	k13_S0_Sub0_mip2	k13_S0_Sub0_mip3	k13_S0_Sub0_mip4	k13_S0_Sub0_mip5	k13_S0_Sub0_mip6	k13_S0_Sub0_mip8	mdr1_S0_Sub0_mip1	mdr1_S0_Sub0_mip12	mdr1_S0_Sub0_mip13	mdr1_S0_Sub0_mip2	mdr1_S0_Sub0_mip3	mdr2_S0_Sub0_mip5
Sample ID
10GHR66017-AG-1	246	388	204	74	285	426	223	17	74	602	246	78	182	121	92	159	308	137	121	491	206	608	184	258	115	102	173	111
10GHR66030-AG-1	676	977	455	194	667	828	421	67	221	1139	315	109	446	194	160	317	533	326	242	624	488	1240	336	450	233	235	273	196
10GHR66031-AG-1	150	213	121	40	161	221	92	17	40	277	133	37	98	62	45	77	147	86	71	206	124	304	88	141	59	55	85	68
10GHR66032-AG-1	217	232	77	14	210	197	65	11	48	423	115	74	311	85	77	124	158	97	116	81	306	570	134	318	134	65	75	55
10GHR66033-AG-1	644	942	298	151	619	702	271	23	165	1147	279	109	467	146	127	293	448	271	253	288	538	1286	310	444	249	188	236	155
10GHR66034-AG-1	1122	1816	746	324	1277	1835	1038	89	405	2327	1000	243	861	461	421	617	1210	616	525	1835	924	2127	744	1056	486	514	718	550
10GHR66037-AG-1	1235	1201	73	42	217	1193	1065	189	308	914	658	16	489	70	0	562	838	383	134	72	6	0	253	421	83	84	337	72
10GHR66038-AG-1	206	322	178	74	236	351	179	12	80	441	193	45	145	83	78	125	260	126	90	364	183	416	130	182	80	105	112	93
10GHR66039-AG-1	1260	1951	920	375	1449	2153	1093	103	390	2702	1083	290	837	584	435	742	1380	757	625	2009	1097	2651	828	1158	552	575	772	580
10GHR66040-AG-1	618	1024	553	223	781	1056	575	31	167	1400	468	140	483	306	280	398	707	375	325	1051	566	1313	433	640	302	310	406	303
10GHR66043-AG-1	200	402	120	51	307	392	227	44	255	635	252	54	232	134	96	142	271	151	135	478	239	529	183	304	130	114	192	157
10GHR66045-AG-1	66	113	25	13	97	86	30	3	19	175	37	17	100	26	19	29	50	22	41	36	111	201	54	98	12	24	37	22
10GHR66046-AG-1	293	457	171	75	388	491	265	42	154	682	299	63	247	126	108	197	341	183	148	486	288	561	232	301	136	146	218	161
10GHR66049-AG-1	8	28	8	4	15	32	9	0	5	29	14	2	11	5	4	10	20	7	5	23	18	30	8	14	4	5	11	12
10GHR66051-AG-1	0	0	0	0	0	1	0	0	0	0	1	0	0	1	1	1	0	0	0	0	0	0	0	0	0	0	0	0
10GHR66052-AG-1	107	180	86	25	146	203	95	6	58	289	118	26	100	64	38	77	137	66	56	206	97	257	78	118	48	57	89	52
10GHR66053-AG-1	139	231	147	56	188	244	144	23	60	407	208	29	148	88	63	115	207	101	97	333	163	338	105	181	78	77	105	93
10GHR66054-AG-1	20	25	22	10	34	44	36	4	18	56	32	8	24	18	6	16	29	20	9	59	25	59	20	25	16	13	26	18
10GHR66055-AG-1	0	0	1	0	0	0	0	0	0	0	0	0	0	0	0	0	0	0	0	0	0	0	0	0	0	0	0	0
10GHR66056-AG-1	1	1	1	0	2	2	1	0	0	6	1	0	0	1	0	4	1	0	0	4	3	3	1	0	1	0	0	1
10GHR66057-AG-1	1	5	1	0	3	3	1	0	1	3	0	0	1	2	0	1	3	2	0	3	2	5	0	0	0	0	1	2
10GHR66058-AG-1	233	371	237	68	250	336	232	29	91	487	201	46	173	102	69	177	256	155	95	441	221	492	164	206	109	104	139	123
10GHR66059-AG-1	245	251	207	96	189	335	254	49	132	319	237	36	157	120	76	155	226	138	112	320	204	329	136	215	127	116	138	147
10GHR66060-AG-1	171	249	120	50	184	209	106	10	37	319	74	30	120	64	32	83	149	88	73	176	143	327	87	131	71	57	61	55
10GHR66061-AG-1	59	121	67	21	91	112	50	4	33	156	46	20	48	24	24	42	67	39	31	94	65	148	50	63	35	25	31	19
10GHR66062-AG-1	126	171	78	35	154	201	108	8	55	285	118	39	71	53	38	70	129	75	67	202	100	275	87	118	33	50	64	63
10GHR66063-AG-1	43	37	24	9	37	48	35	11	39	85	37	8	34	28	3	19	35	11	23	49	30	60	24	28	15	24	29	11
10GHR66064-AG-1	0	1	0	0	1	0	0	0	0	0	1	0	0	0	0	0	1	0	0	1	0	0	0	0	0	0	0	0
10GHR66065-AG-1	21	32	15	4	39	37	23	15	68	70	32	9	19	18	6	13	34	12	26	59	33	66	25	29	17	15	20	13
10GHR66066-AG-1	68	136	65	27	87	114	84	29	103	220	90	20	79	48	25	54	94	45	47	162	87	173	46	88	42	39	47	37
10GHR66067-AG-1	0	0	1	0	1	0	1	0	0	0	1	0	0	0	0	0	0	0	0	0	0	0	0	0	0	0	0	0
10GHR66068-AG-1	0	1	0	0	0	0	0	0	0	0	0	0	0	0	0	0	0	0	0	0	0	0	0	0	0	0	0	0
10GHR66069-AG-1	417	781	348	116	652	833	413	29	196	1274	406	123	433	224	151	264	543	254	238	882	468	1019	345	491	210	232	356	198
10GHR66070-AG-1	25	42	13	7	19	37	29	14	50	43	23	6	24	19	8	18	26	19	12	35	22	55	18	31	16	14	18	13
10GHR66071-AG-1	298	298	20	12	183	305	258	78	224	322	251	30	190	155	0	174	245	171	131	332	163	342	166	214	138	121	187	175
10GHR66072-AG-1	407	566	322	109	433	609	342	24	138	741	356	106	287	162	137	217	383	223	174	694	326	767	246	342	147	165	218	185
10GHR66074-AG-1	17	39	8	3	20	20	2	0	6	38	6	3	15	2	3	9	3	6	3	8	8	36	8	14	10	2	6	1
10GHR66076-AG-1	97	133	40	23	70	98	59	7	48	174	62	21	44	28	4	43	77	37	28	131	57	120	48	67	27	22	58	28
10GHR66077-AG-1	28	26	5	1	12	11	10	0	7	28	4	1	5	3	5	5	7	3	2	1	6	11	7	6	6	2	7	0
10GHR66079-AG-1	2	2	2	0	0	2	2	1	1	2	1	0	0	0	0	0	1	0	0	6	0	3	0	2	0	1	0	2
10GHR66080-AG-1	30	24	17	7	27	36	26	0	8	62	24	12	21	4	4	12	28	17	6	59	21	54	13	27	15	14	22	11
10GHR66082-AG-1	41	59	47	14	55	74	49	0	10	107	28	14	49	18	10	29	69	28	26	100	48	101	47	55	25	25	37	26
10GHR66085-AG-1	20	41	32	5	23	53	22	0	7	85	21	8	25	20	7	20	26	11	9	59	29	55	16	39	15	20	23	20
10GHR66086-AG-1	0	0	0	0	2	0	1	0	0	0	0	0	0	0	0	0	0	0	0	0	1	0	0	0	0	1	0	0
10GHR66087-AG-1	68	72	32	12	56	76	35	6	22	88	37	13	36	27	23	27	56	29	25	75	34	99	32	37	26	17	26	27
10GHR66088-AG-1	227	296	27	10	115	167	69	10	44	214	33	21	73	21	2	56	49	78	36	27	93	265	60	75	36	23	40	22
10GHR66090-AG-1	390	529	321	116	384	589	324	47	185	682	294	73	250	168	100	207	387	203	152	588	265	685	222	263	132	158	200	182
10GHR66091-AG-1	0	0	0	0	0	0	0	0	0	1	0	0	0	0	0	0	0	0	0	0	0	0	0	0	0	0	0	1
10GHR66092-AG-1	180	111	18	8	53	47	25	3	6	153	31	12	60	18	7	30	27	22	30	8	58	200	36	51	19	14	18	6
10GHR66093-AG-1	48	66	15	4	43	34	15	4	12	73	6	0	29	6	3	21	7	17	9	2	19	71	13	23	13	7	7	6
10GHR66094-AG-1	0	1	1	0	1	3	2	1	3	0	0	0	0	0	0	0	1	0	1	0	1	2	0	0	1	1	0	2
10GHR66096-AG-1	36	67	22	14	46	67	25	4	33	111	22	6	30	8	10	22	41	22	15	59	39	100	24	35	21	15	14	11
10GHR66097-AG-1	3	4	5	3	8	8	4	0	1	11	4	0	3	3	2	1	9	3	2	12	8	7	3	4	2	1	4	2
10GHR66098-AG-1	189	292	154	52	220	287	166	40	162	478	178	38	132	86	63	140	225	102	80	365	196	401	126	193	95	103	129	110
10GHR66099-AG-1	436	456	319	126	318	525	350	300	747	579	398	56	303	217	7	286	438	302	215	589	345	271	282	375	193	234	305	260
10GHR66101-AG-1	4	3	0	0	0	1	0	0	2	1	0	0	1	0	0	0	2	0	0	1	0	0	1	0	0	0	0	1
10GHR66102-AG-1	34	40	31	18	32	48	26	45	66	35	30	4	23	26	17	23	25	25	23	53	24	42	16	31	24	17	27	24
10GHR66103-AG-1	140	135	6	5	24	139	95	127	176	111	112	4	74	29	0	61	104	43	31	18	15	63	45	62	22	24	34	18
10GHR66104-AG-1	3	2	6	0	6	9	5	1	1	15	8	1	6	0	2	3	7	3	2	10	6	10	4	8	1	3	3	4
10GHR66105-AG-1	3	10	5	1	9	10	8	1	6	18	7	0	8	4	1	4	5	4	6	9	4	15	4	11	3	2	6	4
10GHR66106-AG-1	41	54	31	7	29	55	39	8	22	86	22	10	29	26	14	14	41	17	15	71	32	83	24	41	12	24	31	19
10GHR66107-AG-1	2	1	1	1	0	4	0	0	0	0	0	0	0	0	0	0	4	0	0	2	1	0	0	1	1	3	0	0
10GHR66108-AG-1	24	24	14	3	21	34	20	1	14	55	28	3	16	10	7	7	36	12	13	56	18	45	21	30	14	15	18	15
10GHR66109-AG-1	24	52	29	10	33	39	18	2	13	64	17	4	23	9	6	16	29	17	15	24	30	61	23	22	15	8	15	6
10GHR6650-AG-1	12	35	14	5	17	27	17	1	1	43	16	2	14	9	9	10	17	11	4	24	16	31	15	18	7	5	13	10
10GR66084-AG-1	1427	2421	1146	513	1711	2173	1101	95	426	3121	917	291	937	512	349	738	1385	795	591	1698	1185	3071	874	1212	561	596	703	481
CR01061101-AG-1	128	151	107	49	103	164	108	16	44	192	98	19	71	54	37	86	114	62	51	176	82	192	77	94	27	59	61	59
CR01061143-AG-1	168	285	153	51	202	251	160	13	61	421	141	25	142	75	60	92	179	97	92	311	155	341	117	166	69	64	113	74
CR0106978-AG-1	33	34	27	10	36	60	41	2	5	83	34	8	36	17	26	23	61	43	28	63	24	76	35	44	23	18	20	19
CR0107249-AG-1	1	3	0	0	0	0	0	0	0	0	0	0	0	0	0	0	0	0	0	0	0	0	0	0	0	0	0	0
CR0107321-AG-1	2	2	2	0	2	2	1	0	2	5	4	0	1	0	0	1	6	0	0	7	4	3	1	2	0	1	0	1
CR0107360-AG-1	3	6	3	1	3	5	4	2	1	4	2	1	3	1	0	3	1	2	0	2	1	6	4	3	3	0	0	4
CR0107441-AG-1	0	0	1	0	0	2	0	0	0	2	0	1	0	0	0	0	0	0	1	0	0	0	0	0	0	0	0	0
CR01A061047-AG-1	166	238	108	51	163	246	110	12	28	328	131	31	133	83	63	110	187	106	92	207	124	348	101	134	76	78	102	87
CR01A061062-AG-1	4	4	4	3	6	6	3	1	0	4	2	0	1	2	0	3	4	6	1	9	4	7	4	2	2	1	4	1
CR01A061146-AG-1	96	166	25	22	81	138	72	2	21	213	37	18	71	28	12	52	74	40	41	107	84	205	54	89	36	33	38	32
CR01A061218-AG-1	77	61	32	27	54	82	57	49	67	70	58	5	49	36	0	47	65	51	36	60	35	79	41	50	36	42	30	43
CR01A061302-AG-1	60	122	70	32	82	129	53	7	41	183	77	14	39	33	27	42	70	55	33	137	63	169	55	92	40	39	41	25
CR01A07063-AG-1	291	539	241	106	371	542	252	18	90	679	218	65	224	119	85	180	317	168	149	450	247	606	170	269	139	126	171	122
CR01A07258-AG-1	174	272	149	54	209	263	144	12	53	429	141	42	118	52	8	84	151	97	81	230	133	397	99	146	82	71	104	71
CR01A07285-AG-1	30	54	15	8	39	51	24	3	13	80	22	6	26	8	11	15	22	12	7	37	28	64	12	31	10	7	20	12
CR01A07291-AG-1	0	0	1	0	0	0	0	0	0	0	0	0	0	1	0	0	0	0	0	0	1	0	1	0	0	0	0	0
CR01A07339-AG-1	126	199	105	41	160	180	160	14	29	345	176	34	120	66	57	92	170	85	65	292	125	287	119	146	70	77	102	83
CR01A07369-AG-1	260	456	89	73	267	459	270	22	104	607	163	68	212	129	3	175	278	160	122	437	242	61	166	260	124	106	173	135
CR01A07465-AG-1	116	212	80	26	130	166	68	11	34	253	48	26	68	28	33	50	105	69	42	113	105	255	52	98	54	36	52	29
CR01A07498-AG-1	21	11	18	14	11	15	13	9	21	21	20	2	12	19	8	16	10	13	8	29	17	22	19	16	13	10	12	14
CR01A07510-AG-1	3	2	2	2	0	6	1	0	7	1	2	1	4	3	0	3	1	1	0	0	2	1	1	3	0	0	2	0
CR01A07612-AG-1	12	21	9	4	13	9	6	0	3	26	7	7	12	3	2	8	3	1	5	7	4	15	4	5	4	3	3	5
CR01A07624-AG-1	1	4	0	0	1	3	1	0	2	3	0	0	4	3	0	1	2	0	1	3	3	3	0	1	3	1	1	4
CR01A07711-AG-1	16	19	16	0	15	29	13	0	9	33	11	4	17	6	3	17	21	7	6	30	16	30	11	16	8	10	11	11
PSER0106505-AG-1	97	161	73	26	143	167	97	17	56	266	104	30	88	49	39	66	115	60	55	236	114	225	82	146	48	58	75	60
PSER0106513-AG-1	1	0	0	0	0	0	0	0	0	0	0	0	0	0	0	0	0	0	0	0	0	1	0	0	0	0	0	0
PSER0106514-AG-1	10	20	3	2	14	22	8	1	4	38	9	2	9	10	6	10	13	7	6	20	16	26	14	20	7	4	8	6
PSER0106519-AG-1	89	119	55	14	109	131	41	2	17	186	55	17	57	36	13	43	61	33	28	123	75	157	49	61	30	30	47	33
PSER0106522-AG-1	14	24	8	3	22	32	13	0	9	38	14	1	21	9	7	7	18	9	6	24	16	41	10	19	7	9	11	6
PSER0106528-AG-1	0	2	2	1	0	1	0	0	1	6	0	0	1	0	0	0	0	0	0	0	0	0	0	0	0	0	0	0
PSER0106540-AG-1	0	2	0	0	1	2	2	1	1	2	1	1	1	0	0	1	0	0	0	2	1	4	1	0	0	0	0	0
PSER0106541-AG-1	195	297	173	56	251	343	182	7	35	438	165	28	163	91	41	98	188	106	86	364	180	393	139	187	76	94	125	81
PSER0106543-AG-1	75	158	77	21	131	179	89	4	20	244	89	21	82	50	46	49	129	61	30	187	69	212	77	83	44	52	66	49
PSER0106544-AG-1	305	513	297	87	399	570	309	12	80	758	193	89	244	154	110	172	293	167	129	479	296	667	209	302	154	139	171	114
PSER0106545-AG-1	3	4	4	1	2	5	0	0	0	2	4	2	1	2	1	1	2	1	1	0	2	2	1	0	2	3	1	0
PSER0106546-AG-1	1	1	0	0	1	0	0	0	1	1	0	0	0	0	0	1	0	0	0	1	2	1	0	0	0	0	0	0
PSER0106550-AG-1	49	63	34	11	71	77	35	0	6	104	29	9	29	18	15	22	46	23	14	64	31	88	24	37	21	12	34	12
PSER0106563-AG-1	166	304	135	56	195	281	121	10	64	442	142	40	147	59	35	103	169	88	83	250	180	440	127	186	91	74	114	57
PSER0106567-AG-1	175	242	98	29	205	279	130	16	111	346	101	31	94	66	43	93	187	90	73	229	113	352	86	133	72	77	105	55
PSER0107024-AG-1	51	113	34	12	78	114	53	3	21	184	76	17	55	23	28	38	63	51	31	142	71	143	71	67	10	34	62	42
PSER0107038-AG-1	9	20	13	6	17	21	25	2	2	24	18	0	13	4	4	6	10	5	5	20	14	21	7	14	6	5	4	7
PSER0107040-AG-1	27	54	16	5	41	65	27	5	19	110	45	7	37	22	5	25	41	22	12	76	29	69	29	39	17	12	28	19
PSER0107062-AG-1	2	14	1	1	11	7	3	0	2	24	4	1	8	3	0	8	6	1	3	7	9	14	7	13	4	2	6	3
PSER0107063-AG-1	43	56	20	13	47	52	42	3	15	100	45	6	26	15	18	25	55	17	29	76	38	84	26	44	22	17	20	22
PSER0107067-AG-1	28	46	25	6	23	36	17	1	12	62	8	9	17	7	8	24	14	11	16	17	29	51	16	36	13	9	10	12
PSER0107072-AG-1	434	715	392	112	560	775	431	35	118	1124	441	104	371	224	150	279	481	253	217	827	414	911	296	492	203	230	343	234
PSER0107075-AG-1	34	39	18	4	42	41	27	2	14	70	15	3	25	12	11	14	21	12	13	40	39	65	26	28	15	7	14	13
PSER0107077-AG-1	93	154	74	22	123	171	81	5	28	240	75	20	80	53	25	63	85	57	41	179	103	218	84	110	49	56	65	38
PSER0107078-AG-1	1	1	0	0	0	0	0	0	2	2	0	1	0	1	0	0	1	0	0	1	0	0	0	0	0	0	0	0
PSER0107080-AG-1	5	21	8	2	12	17	11	2	4	27	6	2	6	7	4	5	9	2	4	9	5	20	9	3	2	6	10	4
PSER0107090-AG-1	845	1367	653	265	984	1440	751	47	190	2148	746	220	680	387	367	597	1009	550	455	1653	825	1922	638	891	366	416	519	382
PSER0107091-AG-1	9	25	8	4	21	29	7	1	9	58	17	6	17	7	2	12	19	7	6	30	11	36	8	11	6	3	9	6
PSER0107092-AG-1	3	5	2	2	5	4	2	0	2	4	5	0	4	2	0	2	4	0	0	7	3	3	0	0	3	0	2	3
PSER0107099-AG-1	1	1	0	0	0	1	1	0	0	0	0	0	0	0	0	0	0	0	0	0	0	0	0	0	0	0	0	0
PSER0107104-AG-1	1	2	0	0	0	3	0	0	0	0	0	0	1	1	0	1	2	0	1	0	0	1	1	1	1	1	0	0
PSER0107106-AG-1	17	22	11	5	18	29	13	1	2	35	3	2	12	3	1	8	17	8	9	34	14	34	6	19	4	7	7	6
PSER0107107-AG-1	111	173	115	25	136	196	105	7	18	267	114	25	101	54	41	76	144	61	47	220	106	258	90	107	43	52	83	68
PSER0107130-AG-1	2	3	2	0	1	3	0	0	0	2	3	0	1	0	1	0	1	0	0	0	1	0	0	1	0	1	0	2
PSER0107131-AG-1	0	0	0	0	1	4	0	0	0	5	1	0	1	0	0	2	0	0	0	1	1	0	1	0	0	1	0	1
PSER0107146-AG-1	370	664	223	97	497	678	307	22	121	911	314	79	276	178	150	192	375	201	150	534	346	834	251	384	158	160	228	148
PSER0107148-AG-1	36	80	44	12	61	86	38	2	21	137	37	12	43	23	18	23	52	26	29	78	41	107	27	60	12	16	32	14
PSER0107149-AG-1	0	0	0	0	0	0	0	0	0	0	0	0	0	0	0	0	0	0	0	0	0	0	0	0	0	0	1	0
PSER0107153-AG-1	5	7	3	0	4	10	9	0	1	16	3	3	3	0	1	4	5	1	0	10	8	8	4	7	2	2	4	1
PSER0107154-AG-1	2	5	2	0	5	2	1	0	0	12	4	1	0	0	0	5	2	2	0	3	0	8	3	1	2	2	1	0
PSER0107155-AG-1	0	0	0	0	0	0	0	0	0	0	0	0	0	0	0	0	0	0	0	0	0	1	0	0	0	0	0	0
PSER0107156-AG-1	159	277	123	30	197	329	135	15	67	431	152	32	130	87	59	113	183	88	68	365	139	378	114	166	71	71	104	78
PSER0107157-AG-1	1	0	0	0	0	0	0	0	0	0	0	0	0	0	0	0	0	0	0	0	0	0	0	0	0	0	0	0
PSER0107160-AG-1	2	2	2	0	8	12	2	0	3	11	2	1	2	1	1	5	2	2	0	1	5	8	5	6	1	2	2	6
PSER0107166-AG-1	4	7	6	1	0	2	1	0	0	9	4	1	3	0	1	1	5	0	3	6	2	11	2	6	1	1	2	1
PSER0107171-AG-1	88	173	53	21	166	172	84	7	55	304	90	32	100	44	27	56	84	58	46	158	105	216	85	86	52	28	65	52
PSER0107174-AG-1	109	306	97	30	231	248	90	5	60	482	127	48	154	50	49	76	135	75	82	217	165	345	129	196	68	52	93	71
PSER0107176-AG-1	65	133	37	21	99	123	69	4	26	160	72	19	70	39	30	46	86	34	29	134	66	156	49	83	36	36	49	40
PSER0107178-AG-1	0	1	1	0	0	5	0	0	1	0	0	1	0	0	1	0	2	3	2	6	0	4	1	4	0	0	0	2
PSER0107180-AG-1	135	279	157	42	226	335	213	10	50	473	139	53	223	117	79	117	210	104	102	329	208	349	136	187	108	83	160	139
PSER0107186-AG-1	26	42	29	3	29	39	31	0	13	47	19	2	20	14	5	17	31	13	10	50	19	36	13	30	14	16	18	17
PSER0107188-AG-1	5	10	7	2	8	8	6	1	2	19	8	1	2	1	0	2	9	3	2	10	6	17	6	8	2	3	0	3
PSER0107193-AG-1	119	216	89	28	162	241	138	11	63	381	106	30	117	75	33	102	151	76	60	264	136	275	109	151	64	59	112	85
PSER0107194-AG-1	366	802	374	114	622	764	529	20	175	1137	297	132	472	233	181	249	504	185	263	847	471	862	319	302	261	200	354	298
PSER0107201-AG-1	27	63	26	10	43	53	30	4	9	66	30	13	24	20	6	17	33	14	5	50	33	55	16	37	14	16	16	12
PSER0107202-AG-1	204	399	214	65	310	355	244	12	48	573	252	53	194	121	80	167	260	146	123	497	210	537	162	245	126	109	165	113
PSER0107203-AG-1	6	3	5	2	11	11	5	1	1	17	3	1	3	1	1	6	7	3	3	13	6	10	6	3	2	2	4	2
PSER0107205-AG-1	3	5	0	0	10	15	5	0	4	28	5	2	2	2	1	7	12	5	5	16	8	13	4	13	2	3	3	8
PSER0107210-AG-1	87	132	0	0	3	1	43	6	7	28	11	0	4	0	0	12	15	1	0	0	0	0	3	1	0	0	3	0
PSER0107219-AG-1	1	5	1	0	3	2	2	0	0	11	0	0	3	3	0	1	0	0	0	1	2	1	1	0	1	0	0	1
PSER0107221-AG-1	59	142	52	16	104	114	53	3	25	215	47	18	55	32	10	44	70	38	45	84	62	157	36	73	35	34	41	20
PSER0107225-AG-1	91	154	0	0	1	23	21	0	0	0	0	0	2	0	0	3	6	0	0	0	0	0	1	1	0	0	0	0
PSER0107227-AG-1	7	18	5	4	8	25	9	0	3	33	24	1	9	6	3	15	11	8	7	24	10	18	5	16	10	8	9	3
PSER0107235-AG-1	43	97	21	9	91	100	57	5	19	164	32	12	49	29	23	50	71	32	34	110	58	149	48	60	41	17	32	28
PSER0107236-AG-1	0	0	0	0	0	0	0	0	0	0	0	0	0	0	0	0	0	0	0	1	0	0	0	0	0	0	0	1
PSER0107248-AG-1	57	119	39	12	71	72	25	5	20	130	23	8	44	12	8	21	36	23	21	31	44	123	42	53	15	13	26	12
PSER0107249-AG-1	35	82	33	7	44	65	36	2	15	121	42	11	41	22	13	25	48	23	25	73	40	78	36	41	27	11	30	25
PSER0107257-AG-1	31	83	32	4	56	80	30	4	15	126	27	13	37	20	14	22	44	29	24	62	44	99	38	33	24	18	26	17
PSER0107262-AG-1	23	45	16	6	29	42	27	3	21	63	38	5	19	10	10	14	34	12	23	57	35	41	22	41	20	7	32	26
PSER0107265-AG-1	0	0	0	0	0	2	1	0	0	0	0	0	0	0	0	0	0	0	1	1	0	0	1	0	0	0	0	0
PSER0107270-AG-1	149	324	141	40	258	340	220	11	89	532	214	61	175	127	92	123	228	111	112	393	186	383	167	256	103	80	146	113
PSER0107271-AG-1	41	81	14	8	52	60	14	0	5	116	27	4	37	21	15	21	25	13	14	25	34	83	20	41	15	12	16	18
PSER0107280-AG-1	4	21	6	4	16	20	13	0	5	34	24	3	11	13	3	11	16	5	5	21	12	29	18	17	3	8	13	6
PSER0107282-AG-1	0	0	1	0	1	0	0	0	0	0	0	0	0	0	0	0	0	0	0	0	0	0	0	0	0	0	0	0
PSER0107283-AG-1	50	124	38	15	88	95	31	1	11	201	44	12	56	20	14	30	51	37	21	43	62	145	45	63	22	15	23	20
PSER0107289-AG-1	0	0	0	0	0	0	0	0	0	0	0	0	0	0	0	0	0	0	0	1	0	1	0	0	1	0	0	0
PSER0107305-AG-1	12	19	5	4	25	19	9	1	5	39	10	5	14	4	5	9	20	9	7	10	5	26	14	7	3	3	8	2
PSER0107306-AG-1	59	103	69	19	98	117	87	3	25	203	75	17	64	50	20	34	101	33	37	167	69	158	56	88	34	37	44	46
PSER0107307-AG-1	2	1	0	0	2	3	1	0	1	1	1	0	1	0	0	0	1	1	2	6	3	6	1	3	2	0	0	0
PSER0107366-AG-1	62	111	53	26	80	108	34	7	29	159	39	18	33	15	20	41	60	33	22	78	44	128	37	61	28	28	49	15
PSER0107411-AG-1	43	91	43	14	53	65	33	1	15	125	33	13	36	17	16	27	35	20	26	49	34	130	30	37	22	22	38	8
PSER0107416-AG-1	351	546	181	83	442	520	214	16	76	850	246	93	268	147	123	197	313	171	161	525	294	702	216	331	137	137	176	122
Cape Coast Pools	14426	15051	1624	1102	5472	8222	5314	865	3756	8177	1872	459	3379	850	194	2387	2106	3887	2557	921	4471	11562	2157	3021	1472	655	1556	1203
Begoro Pools	3300	3154	160	86	389	719	401	199	782	1926	420	75	760	169	14	612	485	759	490	326	846	1947	564	705	407	203	422	230
D6-AG-1	46	89	32	9	72	85	43	2	37	126	22	13	36	25	21	30	55	27	25	86	46	64	46	67	30	22	46	32
D6-AG-2	43	92	39	11	52	74	41	2	49	118	33	20	49	33	12	30	44	16	28	95	49	71	36	36	37	16	41	31
D6-AG-3	106	107	0	0	3	28	105	51	24	2	6	0	4	0	0	29	13	2	0	0	0	0	0	0	0	0	1	0
D6-AG-4	103	113	3	1	69	115	132	115	281	153	134	3	88	15	0	82	81	58	43	2	0	22	81	89	24	16	107	7
D6-AG-5	30	87	49	13	53	98	44	5	48	133	55	10	39	13	21	32	59	24	28	77	59	66	44	44	27	23	40	30
D6-AG-6	49	81	60	10	77	95	53	7	43	132	41	11	35	25	23	34	47	20	22	91	49	67	39	66	28	19	56	30
D10-AG-1	284	508	227	53	412	529	290	24	220	813	211	77	285	181	127	194	298	138	153	596	300	436	275	378	227	117	269	170
D10-AG-2	231	475	163	48	376	485	203	24	222	929	212	91	263	175	124	200	246	92	151	489	293	358	263	395	210	79	251	166
D10-AG-3	521	629	424	124	459	740	649	354	1148	829	440	88	482	440	179	426	503	369	352	846	565	746	415	511	427	371	499	520
D10-AG-4	596	725	27	1	393	694	733	327	1120	918	766	14	520	75	0	509	558	412	244	24	0	111	426	500	142	75	496	26
D10-AG-5	306	536	221	56	404	615	275	26	248	841	207	88	271	190	152	223	360	110	144	614	289	353	264	368	210	130	253	172
D10-AG-6	340	535	237	75	404	600	318	37	269	840	225	71	257	208	149	200	353	123	163	636	340	486	261	379	240	149	287	151
