# Supplementary material for: Immediate pools of malaria infections at diagnosis combined with targeted deep sequencing accurately quantifies frequency of drug resistance mutations
Source: PeerJ. 2021 Nov 9;9:e11794. doi: 10.7717/peerj.11794 (PMC8588852; doi:10.7717/peerj.11794)
Supplement: Supplemental Information 3 [file peerj-09-11794-s003.xlsx]

## Sheet: Sheet1
Supplementary Table 3. Comparison of observed and extected allele frequencies of the controls
Gene ID	Gene	Mutation Name	ExonicFunc	AA Change	Sample ID	Expected Frequency	Observed Frequency
PF3D7_0417200	dhfr-ts	dhfr-ts-Ala16Val	missense_variant	Ala16Val	D10-AG-1	0	0
PF3D7_0417200	dhfr-ts	dhfr-ts-Ala16Val	missense_variant	Ala16Val	D10-AG-2	0	0
PF3D7_0417200	dhfr-ts	dhfr-ts-Ala16Val	missense_variant	Ala16Val	D10-AG-3	0	0
PF3D7_0417200	dhfr-ts	dhfr-ts-Ala16Val	missense_variant	Ala16Val	D10-AG-4	0	0
PF3D7_0417200	dhfr-ts	dhfr-ts-Ala16Val	missense_variant	Ala16Val	D10-AG-5	0	0
PF3D7_0417200	dhfr-ts	dhfr-ts-Ala16Val	missense_variant	Ala16Val	D10-AG-6	0	0
PF3D7_0417200	dhfr-ts	dhfr-ts-Ala16Val	missense_variant	Ala16Val	D6-AG-1	0	0
PF3D7_0417200	dhfr-ts	dhfr-ts-Ala16Val	missense_variant	Ala16Val	D6-AG-2	0	0
PF3D7_0417200	dhfr-ts	dhfr-ts-Ala16Val	missense_variant	Ala16Val	D6-AG-3	0
PF3D7_0417200	dhfr-ts	dhfr-ts-Ala16Val	missense_variant	Ala16Val	D6-AG-4	0	0
PF3D7_0417200	dhfr-ts	dhfr-ts-Ala16Val	missense_variant	Ala16Val	D6-AG-5	0	0
PF3D7_0417200	dhfr-ts	dhfr-ts-Ala16Val	missense_variant	Ala16Val	D6-AG-6	0	0
PF3D7_0417200	dhfr-ts	dhfr-ts-Asn51Ile	missense_variant	Asn51Ile	D10-AG-1	0.19	0.259766
PF3D7_0417200	dhfr-ts	dhfr-ts-Asn51Ile	missense_variant	Asn51Ile	D10-AG-2	0.19	0.287467
PF3D7_0417200	dhfr-ts	dhfr-ts-Asn51Ile	missense_variant	Asn51Ile	D10-AG-3	0.19	0.321513
PF3D7_0417200	dhfr-ts	dhfr-ts-Asn51Ile	missense_variant	Asn51Ile	D10-AG-4	0.19	0.225653
PF3D7_0417200	dhfr-ts	dhfr-ts-Asn51Ile	missense_variant	Asn51Ile	D10-AG-5	0.19	0.269084
PF3D7_0417200	dhfr-ts	dhfr-ts-Asn51Ile	missense_variant	Asn51Ile	D10-AG-6	0.19	0.276056
PF3D7_0417200	dhfr-ts	dhfr-ts-Asn51Ile	missense_variant	Asn51Ile	D6-AG-1	0.19	0.236486
PF3D7_0417200	dhfr-ts	dhfr-ts-Asn51Ile	missense_variant	Asn51Ile	D6-AG-2	0.19	0.271523
PF3D7_0417200	dhfr-ts	dhfr-ts-Asn51Ile	missense_variant	Asn51Ile	D6-AG-3	0.19
PF3D7_0417200	dhfr-ts	dhfr-ts-Asn51Ile	missense_variant	Asn51Ile	D6-AG-4	0.19	0.250871
PF3D7_0417200	dhfr-ts	dhfr-ts-Asn51Ile	missense_variant	Asn51Ile	D6-AG-5	0.19	0.308511
PF3D7_0417200	dhfr-ts	dhfr-ts-Asn51Ile	missense_variant	Asn51Ile	D6-AG-6	0.19	0.277457
PF3D7_0417200	dhfr-ts	dhfr-ts-Cys59Arg	missense_variant	Cys59Arg	D10-AG-1	0.06	0.0644531
PF3D7_0417200	dhfr-ts	dhfr-ts-Cys59Arg	missense_variant	Cys59Arg	D10-AG-2	0.06	0.0797546
PF3D7_0417200	dhfr-ts	dhfr-ts-Cys59Arg	missense_variant	Cys59Arg	D10-AG-3	0.06	0.0835303
PF3D7_0417200	dhfr-ts	dhfr-ts-Cys59Arg	missense_variant	Cys59Arg	D10-AG-4	0.06	0.0581948
PF3D7_0417200	dhfr-ts	dhfr-ts-Cys59Arg	missense_variant	Cys59Arg	D10-AG-5	0.06	0.0658397
PF3D7_0417200	dhfr-ts	dhfr-ts-Cys59Arg	missense_variant	Cys59Arg	D10-AG-6	0.06	0.0741784
PF3D7_0417200	dhfr-ts	dhfr-ts-Cys59Arg	missense_variant	Cys59Arg	D6-AG-1	0.06	0.0608108
PF3D7_0417200	dhfr-ts	dhfr-ts-Cys59Arg	missense_variant	Cys59Arg	D6-AG-2	0.06	0.0860927
PF3D7_0417200	dhfr-ts	dhfr-ts-Cys59Arg	missense_variant	Cys59Arg	D6-AG-3	0.06
PF3D7_0417200	dhfr-ts	dhfr-ts-Cys59Arg	missense_variant	Cys59Arg	D6-AG-4	0.06	0.0696864
PF3D7_0417200	dhfr-ts	dhfr-ts-Cys59Arg	missense_variant	Cys59Arg	D6-AG-5	0.06	0.0638298
PF3D7_0417200	dhfr-ts	dhfr-ts-Cys59Arg	missense_variant	Cys59Arg	D6-AG-6	0.06	0.0520231
PF3D7_0417200	dhfr-ts	dhfr-ts-Ile164Leu	missense_variant	Ile164Leu	D10-AG-1	0	0
PF3D7_0417200	dhfr-ts	dhfr-ts-Ile164Leu	missense_variant	Ile164Leu	D10-AG-2	0	0
PF3D7_0417200	dhfr-ts	dhfr-ts-Ile164Leu	missense_variant	Ile164Leu	D10-AG-3	0	0
PF3D7_0417200	dhfr-ts	dhfr-ts-Ile164Leu	missense_variant	Ile164Leu	D10-AG-4	0	0
PF3D7_0417200	dhfr-ts	dhfr-ts-Ile164Leu	missense_variant	Ile164Leu	D10-AG-5	0	0
PF3D7_0417200	dhfr-ts	dhfr-ts-Ile164Leu	missense_variant	Ile164Leu	D10-AG-6	0	0
PF3D7_0417200	dhfr-ts	dhfr-ts-Ile164Leu	missense_variant	Ile164Leu	D6-AG-1	0	0
PF3D7_0417200	dhfr-ts	dhfr-ts-Ile164Leu	missense_variant	Ile164Leu	D6-AG-2	0	0
PF3D7_0417200	dhfr-ts	dhfr-ts-Ile164Leu	missense_variant	Ile164Leu	D6-AG-3	0
PF3D7_0417200	dhfr-ts	dhfr-ts-Ile164Leu	missense_variant	Ile164Leu	D6-AG-4	0
PF3D7_0417200	dhfr-ts	dhfr-ts-Ile164Leu	missense_variant	Ile164Leu	D6-AG-5	0	0
PF3D7_0417200	dhfr-ts	dhfr-ts-Ile164Leu	missense_variant	Ile164Leu	D6-AG-6	0	0
PF3D7_0417200	dhfr-ts	dhfr-ts-Ser108Asn	missense_variant	Ser108Asn	D10-AG-1	0.33	0.413261
PF3D7_0417200	dhfr-ts	dhfr-ts-Ser108Asn	missense_variant	Ser108Asn	D10-AG-2	0.33	0.43263
PF3D7_0417200	dhfr-ts	dhfr-ts-Ser108Asn	missense_variant	Ser108Asn	D10-AG-3	0.33	0.450995
PF3D7_0417200	dhfr-ts	dhfr-ts-Ser108Asn	missense_variant	Ser108Asn	D10-AG-4	0.33	0.385748
PF3D7_0417200	dhfr-ts	dhfr-ts-Ser108Asn	missense_variant	Ser108Asn	D10-AG-5	0.33	0.433099
PF3D7_0417200	dhfr-ts	dhfr-ts-Ser108Asn	missense_variant	Ser108Asn	D10-AG-6	0.33	0.414613
PF3D7_0417200	dhfr-ts	dhfr-ts-Ser108Asn	missense_variant	Ser108Asn	D6-AG-1	0.33	0.360248
PF3D7_0417200	dhfr-ts	dhfr-ts-Ser108Asn	missense_variant	Ser108Asn	D6-AG-2	0.33	0.421053
PF3D7_0417200	dhfr-ts	dhfr-ts-Ser108Asn	missense_variant	Ser108Asn	D6-AG-3	0.33
PF3D7_0417200	dhfr-ts	dhfr-ts-Ser108Asn	missense_variant	Ser108Asn	D6-AG-4	0.33	0.358621
PF3D7_0417200	dhfr-ts	dhfr-ts-Ser108Asn	missense_variant	Ser108Asn	D6-AG-5	0.33	0.444444
PF3D7_0417200	dhfr-ts	dhfr-ts-Ser108Asn	missense_variant	Ser108Asn	D6-AG-6	0.33	0.407609
PF3D7_0417200	dhfr-ts	dhfr-ts-Ser108Thr	missense_variant	Ser108Thr	D10-AG-1	0	0
PF3D7_0417200	dhfr-ts	dhfr-ts-Ser108Thr	missense_variant	Ser108Thr	D10-AG-2	0	0
PF3D7_0417200	dhfr-ts	dhfr-ts-Ser108Thr	missense_variant	Ser108Thr	D10-AG-3	0	0
PF3D7_0417200	dhfr-ts	dhfr-ts-Ser108Thr	missense_variant	Ser108Thr	D10-AG-4	0	0
PF3D7_0417200	dhfr-ts	dhfr-ts-Ser108Thr	missense_variant	Ser108Thr	D10-AG-5	0	0
PF3D7_0417200	dhfr-ts	dhfr-ts-Ser108Thr	missense_variant	Ser108Thr	D10-AG-6	0	0
PF3D7_0417200	dhfr-ts	dhfr-ts-Ser108Thr	missense_variant	Ser108Thr	D6-AG-1	0	0
PF3D7_0417200	dhfr-ts	dhfr-ts-Ser108Thr	missense_variant	Ser108Thr	D6-AG-2	0	0
PF3D7_0417200	dhfr-ts	dhfr-ts-Ser108Thr	missense_variant	Ser108Thr	D6-AG-3	0
PF3D7_0417200	dhfr-ts	dhfr-ts-Ser108Thr	missense_variant	Ser108Thr	D6-AG-4	0	0
PF3D7_0417200	dhfr-ts	dhfr-ts-Ser108Thr	missense_variant	Ser108Thr	D6-AG-5	0	0
PF3D7_0417200	dhfr-ts	dhfr-ts-Ser108Thr	missense_variant	Ser108Thr	D6-AG-6	0	0
PF3D7_0523000	mdr1	mdr1-Asn1042Asp	missense_variant	Asn1042Asp	D10-AG-1	0.27	0.31746
PF3D7_0523000	mdr1	mdr1-Asn1042Asp	missense_variant	Asn1042Asp	D10-AG-2	0.27	0.321519
PF3D7_0523000	mdr1	mdr1-Asn1042Asp	missense_variant	Asn1042Asp	D10-AG-3	0.27	0.356164
PF3D7_0523000	mdr1	mdr1-Asn1042Asp	missense_variant	Asn1042Asp	D10-AG-4	0.27	0.342
PF3D7_0523000	mdr1	mdr1-Asn1042Asp	missense_variant	Asn1042Asp	D10-AG-5	0.27	0.304348
PF3D7_0523000	mdr1	mdr1-Asn1042Asp	missense_variant	Asn1042Asp	D10-AG-6	0.27	0.300792
PF3D7_0523000	mdr1	mdr1-Asn1042Asp	missense_variant	Asn1042Asp	D6-AG-1	0.27	0.223881
PF3D7_0523000	mdr1	mdr1-Asn1042Asp	missense_variant	Asn1042Asp	D6-AG-2	0.27	0.305556
PF3D7_0523000	mdr1	mdr1-Asn1042Asp	missense_variant	Asn1042Asp	D6-AG-3	0.27
PF3D7_0523000	mdr1	mdr1-Asn1042Asp	missense_variant	Asn1042Asp	D6-AG-4	0.27	0.41573
PF3D7_0523000	mdr1	mdr1-Asn1042Asp	missense_variant	Asn1042Asp	D6-AG-5	0.27	0.363636
PF3D7_0523000	mdr1	mdr1-Asn1042Asp	missense_variant	Asn1042Asp	D6-AG-6	0.27	0.348485
PF3D7_0523000	mdr1	mdr1-Asn86Tyr	missense_variant	Asn86Tyr	D10-AG-1	0.06	0.0581818
PF3D7_0523000	mdr1	mdr1-Asn86Tyr	missense_variant	Asn86Tyr	D10-AG-2	0.06	0.0760456
PF3D7_0523000	mdr1	mdr1-Asn86Tyr	missense_variant	Asn86Tyr	D10-AG-3	0.06	0.0457831
PF3D7_0523000	mdr1	mdr1-Asn86Tyr	missense_variant	Asn86Tyr	D10-AG-4	0.06	0.0446009
PF3D7_0523000	mdr1	mdr1-Asn86Tyr	missense_variant	Asn86Tyr	D10-AG-5	0.06	0.0454545
PF3D7_0523000	mdr1	mdr1-Asn86Tyr	missense_variant	Asn86Tyr	D10-AG-6	0.06	0.0574713
PF3D7_0523000	mdr1	mdr1-Asn86Tyr	missense_variant	Asn86Tyr	D6-AG-1	0.06	0.108696
PF3D7_0523000	mdr1	mdr1-Asn86Tyr	missense_variant	Asn86Tyr	D6-AG-2	0.06	0.0555556
PF3D7_0523000	mdr1	mdr1-Asn86Tyr	missense_variant	Asn86Tyr	D6-AG-3	0.06
PF3D7_0523000	mdr1	mdr1-Asn86Tyr	missense_variant	Asn86Tyr	D6-AG-4	0.06	0
PF3D7_0523000	mdr1	mdr1-Asn86Tyr	missense_variant	Asn86Tyr	D6-AG-5	0.06	0
PF3D7_0523000	mdr1	mdr1-Asn86Tyr	missense_variant	Asn86Tyr	D6-AG-6	0.06	0.102564
PF3D7_0523000	mdr1	mdr1-Asp1246Tyr	missense_variant	Asp1246Tyr	D10-AG-1	0.13	0.132159
PF3D7_0523000	mdr1	mdr1-Asp1246Tyr	missense_variant	Asp1246Tyr	D10-AG-2	0.13	0.180952
PF3D7_0523000	mdr1	mdr1-Asp1246Tyr	missense_variant	Asp1246Tyr	D10-AG-3	0.13	0.147541
PF3D7_0523000	mdr1	mdr1-Asp1246Tyr	missense_variant	Asp1246Tyr	D10-AG-4	0.13	0.112676
PF3D7_0523000	mdr1	mdr1-Asp1246Tyr	missense_variant	Asp1246Tyr	D10-AG-5	0.13	0.185714
PF3D7_0523000	mdr1	mdr1-Asp1246Tyr	missense_variant	Asp1246Tyr	D10-AG-6	0.13	0.1375
PF3D7_0523000	mdr1	mdr1-Asp1246Tyr	missense_variant	Asp1246Tyr	D6-AG-1	0.13	0.2
PF3D7_0523000	mdr1	mdr1-Asp1246Tyr	missense_variant	Asp1246Tyr	D6-AG-2	0.13	0.0810811
PF3D7_0523000	mdr1	mdr1-Asp1246Tyr	missense_variant	Asp1246Tyr	D6-AG-3	0.13
PF3D7_0523000	mdr1	mdr1-Asp1246Tyr	missense_variant	Asp1246Tyr	D6-AG-4	0.13	0.125
PF3D7_0523000	mdr1	mdr1-Asp1246Tyr	missense_variant	Asp1246Tyr	D6-AG-5	0.13	0.222222
PF3D7_0523000	mdr1	mdr1-Asp1246Tyr	missense_variant	Asp1246Tyr	D6-AG-6	0.13	0.142857
PF3D7_0523000	mdr1	mdr1-Ser1034Cys	missense_variant	Ser1034Cys	D10-AG-1	0.13	0.148148
PF3D7_0523000	mdr1	mdr1-Ser1034Cys	missense_variant	Ser1034Cys	D10-AG-2	0.13	0.174684
PF3D7_0523000	mdr1	mdr1-Ser1034Cys	missense_variant	Ser1034Cys	D10-AG-3	0.13	0.174168
PF3D7_0523000	mdr1	mdr1-Ser1034Cys	missense_variant	Ser1034Cys	D10-AG-4	0.13	0.198
PF3D7_0523000	mdr1	mdr1-Ser1034Cys	missense_variant	Ser1034Cys	D10-AG-5	0.13	0.13587
PF3D7_0523000	mdr1	mdr1-Ser1034Cys	missense_variant	Ser1034Cys	D10-AG-6	0.13	0.166227
PF3D7_0523000	mdr1	mdr1-Ser1034Cys	missense_variant	Ser1034Cys	D6-AG-1	0.13	0.164179
PF3D7_0523000	mdr1	mdr1-Ser1034Cys	missense_variant	Ser1034Cys	D6-AG-2	0.13	0
PF3D7_0523000	mdr1	mdr1-Ser1034Cys	missense_variant	Ser1034Cys	D6-AG-3	0.13
PF3D7_0523000	mdr1	mdr1-Ser1034Cys	missense_variant	Ser1034Cys	D6-AG-4	0.13	0.258427
PF3D7_0523000	mdr1	mdr1-Ser1034Cys	missense_variant	Ser1034Cys	D6-AG-5	0.13	0.181818
PF3D7_0523000	mdr1	mdr1-Ser1034Cys	missense_variant	Ser1034Cys	D6-AG-6	0.13	0.181818
PF3D7_0523000	mdr1	mdr1-Tyr184Phe	missense_variant	Tyr184Phe	D10-AG-1	0.27	0.334184
PF3D7_0523000	mdr1	mdr1-Tyr184Phe	missense_variant	Tyr184Phe	D10-AG-2	0.27	0.406433
PF3D7_0523000	mdr1	mdr1-Tyr184Phe	missense_variant	Tyr184Phe	D10-AG-3	0.27	0.354962
PF3D7_0523000	mdr1	mdr1-Tyr184Phe	missense_variant	Tyr184Phe	D10-AG-4	0.27	0.357285
PF3D7_0523000	mdr1	mdr1-Tyr184Phe	missense_variant	Tyr184Phe	D10-AG-5	0.27	0.352792
PF3D7_0523000	mdr1	mdr1-Tyr184Phe	missense_variant	Tyr184Phe	D10-AG-6	0.27	0.373171
PF3D7_0523000	mdr1	mdr1-Tyr184Phe	missense_variant	Tyr184Phe	D6-AG-1	0.27	0.323529
PF3D7_0523000	mdr1	mdr1-Tyr184Phe	missense_variant	Tyr184Phe	D6-AG-2	0.27	0.269231
PF3D7_0523000	mdr1	mdr1-Tyr184Phe	missense_variant	Tyr184Phe	D6-AG-3	0.27
PF3D7_0523000	mdr1	mdr1-Tyr184Phe	missense_variant	Tyr184Phe	D6-AG-4	0.27	0.329897
PF3D7_0523000	mdr1	mdr1-Tyr184Phe	missense_variant	Tyr184Phe	D6-AG-5	0.27	0.552239
PF3D7_0523000	mdr1	mdr1-Tyr184Phe	missense_variant	Tyr184Phe	D6-AG-6	0.27	0.362069
PF3D7_0709000	crt	crt-Ala220Ser	missense_variant	Ala220Ser	D10-AG-1	0.19	0.235714
PF3D7_0709000	crt	crt-Ala220Ser	missense_variant	Ala220Ser	D10-AG-2	0.19	0.161137
PF3D7_0709000	crt	crt-Ala220Ser	missense_variant	Ala220Ser	D10-AG-3	0.19	0.177007
PF3D7_0709000	crt	crt-Ala220Ser	missense_variant	Ala220Ser	D10-AG-4	0.19	0
PF3D7_0709000	crt	crt-Ala220Ser	missense_variant	Ala220Ser	D10-AG-5	0.19	0.194946
PF3D7_0709000	crt	crt-Ala220Ser	missense_variant	Ala220Ser	D10-AG-6	0.19	0.185897
PF3D7_0709000	crt	crt-Ala220Ser	missense_variant	Ala220Ser	D6-AG-1	0.19	0.195122
PF3D7_0709000	crt	crt-Ala220Ser	missense_variant	Ala220Ser	D6-AG-2	0.19	0.22
PF3D7_0709000	crt	crt-Ala220Ser	missense_variant	Ala220Ser	D6-AG-3	0.19
PF3D7_0709000	crt	crt-Ala220Ser	missense_variant	Ala220Ser	D6-AG-4	0.19
PF3D7_0709000	crt	crt-Ala220Ser	missense_variant	Ala220Ser	D6-AG-5	0.19	0.129032
PF3D7_0709000	crt	crt-Ala220Ser	missense_variant	Ala220Ser	D6-AG-6	0.19	0.185714
PF3D7_0709000	crt	crt-Asn326Ser	missense_variant	Asn326Ser	D10-AG-1	0.06	0.0626993
PF3D7_0709000	crt	crt-Asn326Ser	missense_variant	Asn326Ser	D10-AG-2	0.06	0.0650407
PF3D7_0709000	crt	crt-Asn326Ser	missense_variant	Asn326Ser	D10-AG-3	0.06	0.0633862
PF3D7_0709000	crt	crt-Asn326Ser	missense_variant	Asn326Ser	D10-AG-4	0.06	0.0772769
PF3D7_0709000	crt	crt-Asn326Ser	missense_variant	Asn326Ser	D10-AG-5	0.06	0.0520118
PF3D7_0709000	crt	crt-Asn326Ser	missense_variant	Asn326Ser	D10-AG-6	0.06	0.0747012
PF3D7_0709000	crt	crt-Asn326Ser	missense_variant	Asn326Ser	D6-AG-1	0.06	0.0254777
PF3D7_0709000	crt	crt-Asn326Ser	missense_variant	Asn326Ser	D6-AG-2	0.06	0.0793651
PF3D7_0709000	crt	crt-Asn326Ser	missense_variant	Asn326Ser	D6-AG-3	0.06	0.129032
PF3D7_0709000	crt	crt-Asn326Ser	missense_variant	Asn326Ser	D6-AG-4	0.06	0.0652174
PF3D7_0709000	crt	crt-Asn326Ser	missense_variant	Asn326Ser	D6-AG-5	0.06	0.0596026
PF3D7_0709000	crt	crt-Asn326Ser	missense_variant	Asn326Ser	D6-AG-6	0.06	0.0290698
PF3D7_0709000	crt	crt-Asn75Glu	missense_variant	Asn75Glu	D10-AG-1	0.06	0.0580808
PF3D7_0709000	crt	crt-Asn75Glu	missense_variant	Asn75Glu	D10-AG-2	0.06	0.0524079
PF3D7_0709000	crt	crt-Asn75Glu	missense_variant	Asn75Glu	D10-AG-3	0.06	0.0617391
PF3D7_0709000	crt	crt-Asn75Glu	missense_variant	Asn75Glu	D10-AG-4	0.06	0.0492051
PF3D7_0709000	crt	crt-Asn75Glu	missense_variant	Asn75Glu	D10-AG-5	0.06	0.0665083
PF3D7_0709000	crt	crt-Asn75Glu	missense_variant	Asn75Glu	D10-AG-6	0.06	0.0445714
PF3D7_0709000	crt	crt-Asn75Glu	missense_variant	Asn75Glu	D6-AG-1	0.06	0.037037
PF3D7_0709000	crt	crt-Asn75Glu	missense_variant	Asn75Glu	D6-AG-2	0.06	0.0592593
PF3D7_0709000	crt	crt-Asn75Glu	missense_variant	Asn75Glu	D6-AG-3	0.06	0.028169
PF3D7_0709000	crt	crt-Asn75Glu	missense_variant	Asn75Glu	D6-AG-4	0.06	0.0509259
PF3D7_0709000	crt	crt-Asn75Glu	missense_variant	Asn75Glu	D6-AG-5	0.06	0.042735
PF3D7_0709000	crt	crt-Asn75Glu	missense_variant	Asn75Glu	D6-AG-6	0.06	0.0461538
PF3D7_0709000	crt	crt-Cys72Ser	missense_variant	Cys72Ser	D10-AG-1	0.13	0.165404
PF3D7_0709000	crt	crt-Cys72Ser	missense_variant	Cys72Ser	D10-AG-2	0.13	0.148725
PF3D7_0709000	crt	crt-Cys72Ser	missense_variant	Cys72Ser	D10-AG-3	0.13	0.136522
PF3D7_0709000	crt	crt-Cys72Ser	missense_variant	Cys72Ser	D10-AG-4	0.13	0.152914
PF3D7_0709000	crt	crt-Cys72Ser	missense_variant	Cys72Ser	D10-AG-5	0.13	0.150831
PF3D7_0709000	crt	crt-Cys72Ser	missense_variant	Cys72Ser	D10-AG-6	0.13	0.162286
PF3D7_0709000	crt	crt-Cys72Ser	missense_variant	Cys72Ser	D6-AG-1	0.13	0.148148
PF3D7_0709000	crt	crt-Cys72Ser	missense_variant	Cys72Ser	D6-AG-2	0.13	0.133333
PF3D7_0709000	crt	crt-Cys72Ser	missense_variant	Cys72Ser	D6-AG-3	0.13	0.234742
PF3D7_0709000	crt	crt-Cys72Ser	missense_variant	Cys72Ser	D6-AG-4	0.13	0.194444
PF3D7_0709000	crt	crt-Cys72Ser	missense_variant	Cys72Ser	D6-AG-5	0.13	0.179487
PF3D7_0709000	crt	crt-Cys72Ser	missense_variant	Cys72Ser	D6-AG-6	0.13	0.138462
PF3D7_0709000	crt	crt-His97Leu	missense_variant	His97Leu	D10-AG-1	0	0
PF3D7_0709000	crt	crt-His97Leu	missense_variant	His97Leu	D10-AG-2	0	0
PF3D7_0709000	crt	crt-His97Leu	missense_variant	His97Leu	D10-AG-3	0	0
PF3D7_0709000	crt	crt-His97Leu	missense_variant	His97Leu	D10-AG-4	0	0
PF3D7_0709000	crt	crt-His97Leu	missense_variant	His97Leu	D10-AG-5	0	0
PF3D7_0709000	crt	crt-His97Leu	missense_variant	His97Leu	D10-AG-6	0	0
PF3D7_0709000	crt	crt-His97Leu	missense_variant	His97Leu	D6-AG-1	0	0
PF3D7_0709000	crt	crt-His97Leu	missense_variant	His97Leu	D6-AG-2	0	0
PF3D7_0709000	crt	crt-His97Leu	missense_variant	His97Leu	D6-AG-3	0	0
PF3D7_0709000	crt	crt-His97Leu	missense_variant	His97Leu	D6-AG-4	0	0
PF3D7_0709000	crt	crt-His97Leu	missense_variant	His97Leu	D6-AG-5	0	0
PF3D7_0709000	crt	crt-His97Leu	missense_variant	His97Leu	D6-AG-6	0	0
PF3D7_0709000	crt	crt-His97Tyr	missense_variant	His97Tyr	D10-AG-1	0	0
PF3D7_0709000	crt	crt-His97Tyr	missense_variant	His97Tyr	D10-AG-2	0	0
PF3D7_0709000	crt	crt-His97Tyr	missense_variant	His97Tyr	D10-AG-3	0	0
PF3D7_0709000	crt	crt-His97Tyr	missense_variant	His97Tyr	D10-AG-4	0	0
PF3D7_0709000	crt	crt-His97Tyr	missense_variant	His97Tyr	D10-AG-5	0	0
PF3D7_0709000	crt	crt-His97Tyr	missense_variant	His97Tyr	D10-AG-6	0	0
PF3D7_0709000	crt	crt-His97Tyr	missense_variant	His97Tyr	D6-AG-1	0	0
PF3D7_0709000	crt	crt-His97Tyr	missense_variant	His97Tyr	D6-AG-2	0	0
PF3D7_0709000	crt	crt-His97Tyr	missense_variant	His97Tyr	D6-AG-3	0	0
PF3D7_0709000	crt	crt-His97Tyr	missense_variant	His97Tyr	D6-AG-4	0	0
PF3D7_0709000	crt	crt-His97Tyr	missense_variant	His97Tyr	D6-AG-5	0	0
PF3D7_0709000	crt	crt-His97Tyr	missense_variant	His97Tyr	D6-AG-6	0	0
PF3D7_0709000	crt	crt-Ile356Thr	missense_variant	Ile356Thr	D10-AG-1	0.06	0.0610501
PF3D7_0709000	crt	crt-Ile356Thr	missense_variant	Ile356Thr	D10-AG-2	0.06	0.0552326
PF3D7_0709000	crt	crt-Ile356Thr	missense_variant	Ile356Thr	D10-AG-3	0.06	0.0575954
PF3D7_0709000	crt	crt-Ile356Thr	missense_variant	Ile356Thr	D10-AG-4	0.06	0.0679748
PF3D7_0709000	crt	crt-Ile356Thr	missense_variant	Ile356Thr	D10-AG-5	0.06	0.0516854
PF3D7_0709000	crt	crt-Ile356Thr	missense_variant	Ile356Thr	D10-AG-6	0.06	0.0697168
PF3D7_0709000	crt	crt-Ile356Thr	missense_variant	Ile356Thr	D6-AG-1	0.06	0.03125
PF3D7_0709000	crt	crt-Ile356Thr	missense_variant	Ile356Thr	D6-AG-2	0.06	0.0434783
PF3D7_0709000	crt	crt-Ile356Thr	missense_variant	Ile356Thr	D6-AG-3	0.06	0.105263
PF3D7_0709000	crt	crt-Ile356Thr	missense_variant	Ile356Thr	D6-AG-4	0.06	0.0850202
PF3D7_0709000	crt	crt-Ile356Thr	missense_variant	Ile356Thr	D6-AG-5	0.06	0.0140845
PF3D7_0709000	crt	crt-Ile356Thr	missense_variant	Ile356Thr	D6-AG-6	0.06	0.0405405
PF3D7_0709000	crt	crt-Lys76Thr	missense_variant	Lys76Thr	D10-AG-1	0.19	0.223485
PF3D7_0709000	crt	crt-Lys76Thr	missense_variant	Lys76Thr	D10-AG-2	0.19	0.201133
PF3D7_0709000	crt	crt-Lys76Thr	missense_variant	Lys76Thr	D10-AG-3	0.19	0.198261
PF3D7_0709000	crt	crt-Lys76Thr	missense_variant	Lys76Thr	D10-AG-4	0.19	0.20212
PF3D7_0709000	crt	crt-Lys76Thr	missense_variant	Lys76Thr	D10-AG-5	0.19	0.21734
PF3D7_0709000	crt	crt-Lys76Thr	missense_variant	Lys76Thr	D10-AG-6	0.19	0.206857
PF3D7_0709000	crt	crt-Lys76Thr	missense_variant	Lys76Thr	D6-AG-1	0.19	0.185185
PF3D7_0709000	crt	crt-Lys76Thr	missense_variant	Lys76Thr	D6-AG-2	0.19	0.192593
PF3D7_0709000	crt	crt-Lys76Thr	missense_variant	Lys76Thr	D6-AG-3	0.19	0.262911
PF3D7_0709000	crt	crt-Lys76Thr	missense_variant	Lys76Thr	D6-AG-4	0.19	0.24537
PF3D7_0709000	crt	crt-Lys76Thr	missense_variant	Lys76Thr	D6-AG-5	0.19	0.222222
PF3D7_0709000	crt	crt-Lys76Thr	missense_variant	Lys76Thr	D6-AG-6	0.19	0.184615
PF3D7_0709000	crt	crt-Met74Ile	missense_variant	Met74Ile	D10-AG-1	0.06	0.0580808
PF3D7_0709000	crt	crt-Met74Ile	missense_variant	Met74Ile	D10-AG-2	0.06	0.0524079
PF3D7_0709000	crt	crt-Met74Ile	missense_variant	Met74Ile	D10-AG-3	0.06	0.0617391
PF3D7_0709000	crt	crt-Met74Ile	missense_variant	Met74Ile	D10-AG-4	0.06	0.0492051
PF3D7_0709000	crt	crt-Met74Ile	missense_variant	Met74Ile	D10-AG-5	0.06	0.0665083
PF3D7_0709000	crt	crt-Met74Ile	missense_variant	Met74Ile	D10-AG-6	0.06	0.0445714
PF3D7_0709000	crt	crt-Met74Ile	missense_variant	Met74Ile	D6-AG-1	0.06	0.037037
PF3D7_0709000	crt	crt-Met74Ile	missense_variant	Met74Ile	D6-AG-2	0.06	0.0592593
PF3D7_0709000	crt	crt-Met74Ile	missense_variant	Met74Ile	D6-AG-3	0.06	0.028169
PF3D7_0709000	crt	crt-Met74Ile	missense_variant	Met74Ile	D6-AG-4	0.06	0.0509259
PF3D7_0709000	crt	crt-Met74Ile	missense_variant	Met74Ile	D6-AG-5	0.06	0.042735
PF3D7_0709000	crt	crt-Met74Ile	missense_variant	Met74Ile	D6-AG-6	0.06	0.0461538
PF3D7_0810800	dhps	dhps-Ala581Gly	missense_variant	Ala581Gly	D10-AG-1	0	0
PF3D7_0810800	dhps	dhps-Ala581Gly	missense_variant	Ala581Gly	D10-AG-2	0	0
PF3D7_0810800	dhps	dhps-Ala581Gly	missense_variant	Ala581Gly	D10-AG-3	0	0
PF3D7_0810800	dhps	dhps-Ala581Gly	missense_variant	Ala581Gly	D10-AG-4	0	0
PF3D7_0810800	dhps	dhps-Ala581Gly	missense_variant	Ala581Gly	D10-AG-5	0	0
PF3D7_0810800	dhps	dhps-Ala581Gly	missense_variant	Ala581Gly	D10-AG-6	0	0
PF3D7_0810800	dhps	dhps-Ala581Gly	missense_variant	Ala581Gly	D6-AG-1	0	0
PF3D7_0810800	dhps	dhps-Ala581Gly	missense_variant	Ala581Gly	D6-AG-2	0	0
PF3D7_0810800	dhps	dhps-Ala581Gly	missense_variant	Ala581Gly	D6-AG-3	0
PF3D7_0810800	dhps	dhps-Ala581Gly	missense_variant	Ala581Gly	D6-AG-4	0	0
PF3D7_0810800	dhps	dhps-Ala581Gly	missense_variant	Ala581Gly	D6-AG-5	0	0
PF3D7_0810800	dhps	dhps-Ala581Gly	missense_variant	Ala581Gly	D6-AG-6	0	0
PF3D7_0810800	dhps	dhps-Ala613Ser	missense_variant	Ala613Ser	D10-AG-1	0.06	0.0718232
PF3D7_0810800	dhps	dhps-Ala613Ser	missense_variant	Ala613Ser	D10-AG-2	0.06	0.0571429
PF3D7_0810800	dhps	dhps-Ala613Ser	missense_variant	Ala613Ser	D10-AG-3	0.06	0.0727273
PF3D7_0810800	dhps	dhps-Ala613Ser	missense_variant	Ala613Ser	D10-AG-4	0.06	0.12
PF3D7_0810800	dhps	dhps-Ala613Ser	missense_variant	Ala613Ser	D10-AG-5	0.06	0.0789474
PF3D7_0810800	dhps	dhps-Ala613Ser	missense_variant	Ala613Ser	D10-AG-6	0.06	0.0240385
PF3D7_0810800	dhps	dhps-Ala613Ser	missense_variant	Ala613Ser	D6-AG-1	0.06	0
PF3D7_0810800	dhps	dhps-Ala613Ser	missense_variant	Ala613Ser	D6-AG-2	0.06	0.0606061
PF3D7_0810800	dhps	dhps-Ala613Ser	missense_variant	Ala613Ser	D6-AG-3	0.06
PF3D7_0810800	dhps	dhps-Ala613Ser	missense_variant	Ala613Ser	D6-AG-4	0.06	0.133333
PF3D7_0810800	dhps	dhps-Ala613Ser	missense_variant	Ala613Ser	D6-AG-5	0.06	0.153846
PF3D7_0810800	dhps	dhps-Ala613Ser	missense_variant	Ala613Ser	D6-AG-6	0.06	0.08
PF3D7_0810800	dhps	dhps-Ala613Thr	missense_variant	Ala613Thr	D10-AG-1	0	0
PF3D7_0810800	dhps	dhps-Ala613Thr	missense_variant	Ala613Thr	D10-AG-2	0	0
PF3D7_0810800	dhps	dhps-Ala613Thr	missense_variant	Ala613Thr	D10-AG-3	0	0
PF3D7_0810800	dhps	dhps-Ala613Thr	missense_variant	Ala613Thr	D10-AG-4	0	0
PF3D7_0810800	dhps	dhps-Ala613Thr	missense_variant	Ala613Thr	D10-AG-5	0	0
PF3D7_0810800	dhps	dhps-Ala613Thr	missense_variant	Ala613Thr	D10-AG-6	0	0
PF3D7_0810800	dhps	dhps-Ala613Thr	missense_variant	Ala613Thr	D6-AG-1	0	0
PF3D7_0810800	dhps	dhps-Ala613Thr	missense_variant	Ala613Thr	D6-AG-2	0	0
PF3D7_0810800	dhps	dhps-Ala613Thr	missense_variant	Ala613Thr	D6-AG-3	0
PF3D7_0810800	dhps	dhps-Ala613Thr	missense_variant	Ala613Thr	D6-AG-4	0	0
PF3D7_0810800	dhps	dhps-Ala613Thr	missense_variant	Ala613Thr	D6-AG-5	0	0
PF3D7_0810800	dhps	dhps-Ala613Thr	missense_variant	Ala613Thr	D6-AG-6	0	0
PF3D7_0810800	dhps	dhps-Ile431Val	missense_variant	Ile431Val	D10-AG-1	0	0
PF3D7_0810800	dhps	dhps-Ile431Val	missense_variant	Ile431Val	D10-AG-2	0	0
PF3D7_0810800	dhps	dhps-Ile431Val	missense_variant	Ile431Val	D10-AG-3	0	0
PF3D7_0810800	dhps	dhps-Ile431Val	missense_variant	Ile431Val	D10-AG-4	0	0
PF3D7_0810800	dhps	dhps-Ile431Val	missense_variant	Ile431Val	D10-AG-5	0	0
PF3D7_0810800	dhps	dhps-Ile431Val	missense_variant	Ile431Val	D10-AG-6	0	0
PF3D7_0810800	dhps	dhps-Ile431Val	missense_variant	Ile431Val	D6-AG-1	0	0
PF3D7_0810800	dhps	dhps-Ile431Val	missense_variant	Ile431Val	D6-AG-2	0	0
PF3D7_0810800	dhps	dhps-Ile431Val	missense_variant	Ile431Val	D6-AG-3	0
PF3D7_0810800	dhps	dhps-Ile431Val	missense_variant	Ile431Val	D6-AG-4	0	0
PF3D7_0810800	dhps	dhps-Ile431Val	missense_variant	Ile431Val	D6-AG-5	0	0
PF3D7_0810800	dhps	dhps-Ile431Val	missense_variant	Ile431Val	D6-AG-6	0	0
PF3D7_0810800	dhps	dhps-Lys540Glu	missense_variant	Lys540Glu	D10-AG-1	0	0
PF3D7_0810800	dhps	dhps-Lys540Glu	missense_variant	Lys540Glu	D10-AG-2	0	0
PF3D7_0810800	dhps	dhps-Lys540Glu	missense_variant	Lys540Glu	D10-AG-3	0	0
PF3D7_0810800	dhps	dhps-Lys540Glu	missense_variant	Lys540Glu	D10-AG-4	0	0
PF3D7_0810800	dhps	dhps-Lys540Glu	missense_variant	Lys540Glu	D10-AG-5	0	0
PF3D7_0810800	dhps	dhps-Lys540Glu	missense_variant	Lys540Glu	D10-AG-6	0	0
PF3D7_0810800	dhps	dhps-Lys540Glu	missense_variant	Lys540Glu	D6-AG-1	0	0
PF3D7_0810800	dhps	dhps-Lys540Glu	missense_variant	Lys540Glu	D6-AG-2	0	0
PF3D7_0810800	dhps	dhps-Lys540Glu	missense_variant	Lys540Glu	D6-AG-3	0
PF3D7_0810800	dhps	dhps-Lys540Glu	missense_variant	Lys540Glu	D6-AG-4	0	0
PF3D7_0810800	dhps	dhps-Lys540Glu	missense_variant	Lys540Glu	D6-AG-5	0	0
PF3D7_0810800	dhps	dhps-Lys540Glu	missense_variant	Lys540Glu	D6-AG-6	0	0
PF3D7_0810800	dhps	dhps-Ser436Ala	missense_variant	Ser436Ala	D10-AG-1	0	0
PF3D7_0810800	dhps	dhps-Ser436Ala	missense_variant	Ser436Ala	D10-AG-2	0	0
PF3D7_0810800	dhps	dhps-Ser436Ala	missense_variant	Ser436Ala	D10-AG-3	0	0
PF3D7_0810800	dhps	dhps-Ser436Ala	missense_variant	Ser436Ala	D10-AG-4	0	0
PF3D7_0810800	dhps	dhps-Ser436Ala	missense_variant	Ser436Ala	D10-AG-5	0	0
PF3D7_0810800	dhps	dhps-Ser436Ala	missense_variant	Ser436Ala	D10-AG-6	0	0
PF3D7_0810800	dhps	dhps-Ser436Ala	missense_variant	Ser436Ala	D6-AG-1	0	0
PF3D7_0810800	dhps	dhps-Ser436Ala	missense_variant	Ser436Ala	D6-AG-2	0	0
PF3D7_0810800	dhps	dhps-Ser436Ala	missense_variant	Ser436Ala	D6-AG-3	0
PF3D7_0810800	dhps	dhps-Ser436Ala	missense_variant	Ser436Ala	D6-AG-4	0	0
PF3D7_0810800	dhps	dhps-Ser436Ala	missense_variant	Ser436Ala	D6-AG-5	0	0
PF3D7_0810800	dhps	dhps-Ser436Ala	missense_variant	Ser436Ala	D6-AG-6	0	0
PF3D7_0810800	dhps	dhps-Ser436Phe	missense_variant	Ser436Phe	D10-AG-1	0.06	0.0526316
PF3D7_0810800	dhps	dhps-Ser436Phe	missense_variant	Ser436Phe	D10-AG-2	0.06	0.0496183
PF3D7_0810800	dhps	dhps-Ser436Phe	missense_variant	Ser436Phe	D10-AG-3	0.06	0.0580913
PF3D7_0810800	dhps	dhps-Ser436Phe	missense_variant	Ser436Phe	D10-AG-4	0.06	0.0557692
PF3D7_0810800	dhps	dhps-Ser436Phe	missense_variant	Ser436Phe	D10-AG-5	0.06	0.095941
PF3D7_0810800	dhps	dhps-Ser436Phe	missense_variant	Ser436Phe	D10-AG-6	0.06	0.0466926
PF3D7_0810800	dhps	dhps-Ser436Phe	missense_variant	Ser436Phe	D6-AG-1	0.06	0.0833333
PF3D7_0810800	dhps	dhps-Ser436Phe	missense_variant	Ser436Phe	D6-AG-2	0.06	0.0816327
PF3D7_0810800	dhps	dhps-Ser436Phe	missense_variant	Ser436Phe	D6-AG-3	0.06
PF3D7_0810800	dhps	dhps-Ser436Phe	missense_variant	Ser436Phe	D6-AG-4	0.06	0.0454545
PF3D7_0810800	dhps	dhps-Ser436Phe	missense_variant	Ser436Phe	D6-AG-5	0.06	0
PF3D7_0810800	dhps	dhps-Ser436Phe	missense_variant	Ser436Phe	D6-AG-6	0.06	0.0857143
PF3D7_1343700	k13	k13-Arg539Thr	missense_variant	Arg539Thr	D10-AG-1	0	0
PF3D7_1343700	k13	k13-Arg539Thr	missense_variant	Arg539Thr	D10-AG-2	0	0
PF3D7_1343700	k13	k13-Arg539Thr	missense_variant	Arg539Thr	D10-AG-3	0	0
PF3D7_1343700	k13	k13-Arg539Thr	missense_variant	Arg539Thr	D10-AG-4	0	0
PF3D7_1343700	k13	k13-Arg539Thr	missense_variant	Arg539Thr	D10-AG-5	0	0
PF3D7_1343700	k13	k13-Arg539Thr	missense_variant	Arg539Thr	D10-AG-6	0	0
PF3D7_1343700	k13	k13-Arg539Thr	missense_variant	Arg539Thr	D6-AG-1	0	0
PF3D7_1343700	k13	k13-Arg539Thr	missense_variant	Arg539Thr	D6-AG-2	0	0
PF3D7_1343700	k13	k13-Arg539Thr	missense_variant	Arg539Thr	D6-AG-3	0	0
PF3D7_1343700	k13	k13-Arg539Thr	missense_variant	Arg539Thr	D6-AG-4	0	0
PF3D7_1343700	k13	k13-Arg539Thr	missense_variant	Arg539Thr	D6-AG-5	0	0
PF3D7_1343700	k13	k13-Arg539Thr	missense_variant	Arg539Thr	D6-AG-6	0	0
PF3D7_1343700	k13	k13-Cys580Tyr	missense_variant	Cys580Tyr	D10-AG-1	0	0
PF3D7_1343700	k13	k13-Cys580Tyr	missense_variant	Cys580Tyr	D10-AG-2	0	0
PF3D7_1343700	k13	k13-Cys580Tyr	missense_variant	Cys580Tyr	D10-AG-3	0	0
PF3D7_1343700	k13	k13-Cys580Tyr	missense_variant	Cys580Tyr	D10-AG-4	0	0
PF3D7_1343700	k13	k13-Cys580Tyr	missense_variant	Cys580Tyr	D10-AG-5	0	0
PF3D7_1343700	k13	k13-Cys580Tyr	missense_variant	Cys580Tyr	D10-AG-6	0	0
PF3D7_1343700	k13	k13-Cys580Tyr	missense_variant	Cys580Tyr	D6-AG-1	0	0
PF3D7_1343700	k13	k13-Cys580Tyr	missense_variant	Cys580Tyr	D6-AG-2	0	0
PF3D7_1343700	k13	k13-Cys580Tyr	missense_variant	Cys580Tyr	D6-AG-3	0	0
PF3D7_1343700	k13	k13-Cys580Tyr	missense_variant	Cys580Tyr	D6-AG-4	0	0
PF3D7_1343700	k13	k13-Cys580Tyr	missense_variant	Cys580Tyr	D6-AG-5	0	0
PF3D7_1343700	k13	k13-Cys580Tyr	missense_variant	Cys580Tyr	D6-AG-6	0	0
PF3D7_1343700	k13	k13-Ile543Thr	missense_variant	Ile543Thr	D10-AG-1	0	0
PF3D7_1343700	k13	k13-Ile543Thr	missense_variant	Ile543Thr	D10-AG-2	0	0
PF3D7_1343700	k13	k13-Ile543Thr	missense_variant	Ile543Thr	D10-AG-3	0	0
PF3D7_1343700	k13	k13-Ile543Thr	missense_variant	Ile543Thr	D10-AG-4	0	0
PF3D7_1343700	k13	k13-Ile543Thr	missense_variant	Ile543Thr	D10-AG-5	0	0
PF3D7_1343700	k13	k13-Ile543Thr	missense_variant	Ile543Thr	D10-AG-6	0	0
PF3D7_1343700	k13	k13-Ile543Thr	missense_variant	Ile543Thr	D6-AG-1	0	0
PF3D7_1343700	k13	k13-Ile543Thr	missense_variant	Ile543Thr	D6-AG-2	0	0
PF3D7_1343700	k13	k13-Ile543Thr	missense_variant	Ile543Thr	D6-AG-3	0	0
PF3D7_1343700	k13	k13-Ile543Thr	missense_variant	Ile543Thr	D6-AG-4	0	0
PF3D7_1343700	k13	k13-Ile543Thr	missense_variant	Ile543Thr	D6-AG-5	0	0
PF3D7_1343700	k13	k13-Ile543Thr	missense_variant	Ile543Thr	D6-AG-6	0	0
PF3D7_1343700	k13	k13-Met476Ile	missense_variant	Met476Ile	D10-AG-1	0	0
PF3D7_1343700	k13	k13-Met476Ile	missense_variant	Met476Ile	D10-AG-2	0	0
PF3D7_1343700	k13	k13-Met476Ile	missense_variant	Met476Ile	D10-AG-3	0	0
PF3D7_1343700	k13	k13-Met476Ile	missense_variant	Met476Ile	D10-AG-4	0	0
PF3D7_1343700	k13	k13-Met476Ile	missense_variant	Met476Ile	D10-AG-5	0	0
PF3D7_1343700	k13	k13-Met476Ile	missense_variant	Met476Ile	D10-AG-6	0	0
PF3D7_1343700	k13	k13-Met476Ile	missense_variant	Met476Ile	D6-AG-1	0	0
PF3D7_1343700	k13	k13-Met476Ile	missense_variant	Met476Ile	D6-AG-2	0	0
PF3D7_1343700	k13	k13-Met476Ile	missense_variant	Met476Ile	D6-AG-3	0	0
PF3D7_1343700	k13	k13-Met476Ile	missense_variant	Met476Ile	D6-AG-4	0	0
PF3D7_1343700	k13	k13-Met476Ile	missense_variant	Met476Ile	D6-AG-5	0	0
PF3D7_1343700	k13	k13-Met476Ile	missense_variant	Met476Ile	D6-AG-6	0	0
PF3D7_1343700	k13	k13-Tyr493His	missense_variant	Tyr493His	D10-AG-1	0	0
PF3D7_1343700	k13	k13-Tyr493His	missense_variant	Tyr493His	D10-AG-2	0	0
PF3D7_1343700	k13	k13-Tyr493His	missense_variant	Tyr493His	D10-AG-3	0	0
PF3D7_1343700	k13	k13-Tyr493His	missense_variant	Tyr493His	D10-AG-4	0	0
PF3D7_1343700	k13	k13-Tyr493His	missense_variant	Tyr493His	D10-AG-5	0	0
PF3D7_1343700	k13	k13-Tyr493His	missense_variant	Tyr493His	D10-AG-6	0	0
PF3D7_1343700	k13	k13-Tyr493His	missense_variant	Tyr493His	D6-AG-1	0	0
PF3D7_1343700	k13	k13-Tyr493His	missense_variant	Tyr493His	D6-AG-2	0	0
PF3D7_1343700	k13	k13-Tyr493His	missense_variant	Tyr493His	D6-AG-3	0	0
PF3D7_1343700	k13	k13-Tyr493His	missense_variant	Tyr493His	D6-AG-4	0	0
PF3D7_1343700	k13	k13-Tyr493His	missense_variant	Tyr493His	D6-AG-5	0	0
PF3D7_1343700	k13	k13-Tyr493His	missense_variant	Tyr493His	D6-AG-6	0	0
PF3D7_1447900	mdr2	mdr2-Thr484Ile	missense_variant	Thr484Ile	D10-AG-1	0.06	0.0588235
PF3D7_1447900	mdr2	mdr2-Thr484Ile	missense_variant	Thr484Ile	D10-AG-2	0.06	0.0421687
PF3D7_1447900	mdr2	mdr2-Thr484Ile	missense_variant	Thr484Ile	D10-AG-3	0.06	0.0596154
PF3D7_1447900	mdr2	mdr2-Thr484Ile	missense_variant	Thr484Ile	D10-AG-4	0.06	0
PF3D7_1447900	mdr2	mdr2-Thr484Ile	missense_variant	Thr484Ile	D10-AG-5	0.06	0.0581395
PF3D7_1447900	mdr2	mdr2-Thr484Ile	missense_variant	Thr484Ile	D10-AG-6	0.06	0.0728477
PF3D7_1447900	mdr2	mdr2-Thr484Ile	missense_variant	Thr484Ile	D6-AG-1	0.06	0.125
PF3D7_1447900	mdr2	mdr2-Thr484Ile	missense_variant	Thr484Ile	D6-AG-2	0.06	0
PF3D7_1447900	mdr2	mdr2-Thr484Ile	missense_variant	Thr484Ile	D6-AG-3	0.06
PF3D7_1447900	mdr2	mdr2-Thr484Ile	missense_variant	Thr484Ile	D6-AG-4	0.06
PF3D7_1447900	mdr2	mdr2-Thr484Ile	missense_variant	Thr484Ile	D6-AG-5	0.06	0.166667
PF3D7_1447900	mdr2	mdr2-Thr484Ile	missense_variant	Thr484Ile	D6-AG-6	0.06	0.1
mal_mito_3	cytb	cytb-Met133Ile	missense_variant	Met133Ile	D10-AG-1	0	0
mal_mito_3	cytb	cytb-Met133Ile	missense_variant	Met133Ile	D10-AG-2	0	0
mal_mito_3	cytb	cytb-Met133Ile	missense_variant	Met133Ile	D10-AG-3	0	0
mal_mito_3	cytb	cytb-Met133Ile	missense_variant	Met133Ile	D10-AG-4	0	0
mal_mito_3	cytb	cytb-Met133Ile	missense_variant	Met133Ile	D10-AG-5	0	0
mal_mito_3	cytb	cytb-Met133Ile	missense_variant	Met133Ile	D10-AG-6	0	0
mal_mito_3	cytb	cytb-Met133Ile	missense_variant	Met133Ile	D6-AG-1	0
mal_mito_3	cytb	cytb-Met133Ile	missense_variant	Met133Ile	D6-AG-2	0
mal_mito_3	cytb	cytb-Met133Ile	missense_variant	Met133Ile	D6-AG-3	0	0
mal_mito_3	cytb	cytb-Met133Ile	missense_variant	Met133Ile	D6-AG-4	0	0
mal_mito_3	cytb	cytb-Met133Ile	missense_variant	Met133Ile	D6-AG-5	0
mal_mito_3	cytb	cytb-Met133Ile	missense_variant	Met133Ile	D6-AG-6	0
mal_mito_3	cytb	cytb-Tyr268Asn	missense_variant	Tyr268Asn	D10-AG-1	0	0
mal_mito_3	cytb	cytb-Tyr268Asn	missense_variant	Tyr268Asn	D10-AG-2	0	0
mal_mito_3	cytb	cytb-Tyr268Asn	missense_variant	Tyr268Asn	D10-AG-3	0	0
mal_mito_3	cytb	cytb-Tyr268Asn	missense_variant	Tyr268Asn	D10-AG-4	0	0
mal_mito_3	cytb	cytb-Tyr268Asn	missense_variant	Tyr268Asn	D10-AG-5	0	0
mal_mito_3	cytb	cytb-Tyr268Asn	missense_variant	Tyr268Asn	D10-AG-6	0	0
mal_mito_3	cytb	cytb-Tyr268Asn	missense_variant	Tyr268Asn	D6-AG-1	0	0
mal_mito_3	cytb	cytb-Tyr268Asn	missense_variant	Tyr268Asn	D6-AG-2	0	0
mal_mito_3	cytb	cytb-Tyr268Asn	missense_variant	Tyr268Asn	D6-AG-3	0	0
mal_mito_3	cytb	cytb-Tyr268Asn	missense_variant	Tyr268Asn	D6-AG-4	0	0
mal_mito_3	cytb	cytb-Tyr268Asn	missense_variant	Tyr268Asn	D6-AG-5	0	0
mal_mito_3	cytb	cytb-Tyr268Asn	missense_variant	Tyr268Asn	D6-AG-6	0	0
mal_mito_3	cytb	cytb-Tyr268Cys	missense_variant	Tyr268Cys	D10-AG-1	0	0
mal_mito_3	cytb	cytb-Tyr268Cys	missense_variant	Tyr268Cys	D10-AG-2	0	0
mal_mito_3	cytb	cytb-Tyr268Cys	missense_variant	Tyr268Cys	D10-AG-3	0	0
mal_mito_3	cytb	cytb-Tyr268Cys	missense_variant	Tyr268Cys	D10-AG-4	0	0
mal_mito_3	cytb	cytb-Tyr268Cys	missense_variant	Tyr268Cys	D10-AG-5	0	0
mal_mito_3	cytb	cytb-Tyr268Cys	missense_variant	Tyr268Cys	D10-AG-6	0	0
mal_mito_3	cytb	cytb-Tyr268Cys	missense_variant	Tyr268Cys	D6-AG-1	0	0
mal_mito_3	cytb	cytb-Tyr268Cys	missense_variant	Tyr268Cys	D6-AG-2	0	0
mal_mito_3	cytb	cytb-Tyr268Cys	missense_variant	Tyr268Cys	D6-AG-3	0	0
mal_mito_3	cytb	cytb-Tyr268Cys	missense_variant	Tyr268Cys	D6-AG-4	0	0
mal_mito_3	cytb	cytb-Tyr268Cys	missense_variant	Tyr268Cys	D6-AG-5	0	0
mal_mito_3	cytb	cytb-Tyr268Cys	missense_variant	Tyr268Cys	D6-AG-6	0	0
mal_mito_3	cytb	cytb-Tyr268Ser	missense_variant	Tyr268Ser	D10-AG-1	0	0
mal_mito_3	cytb	cytb-Tyr268Ser	missense_variant	Tyr268Ser	D10-AG-2	0	0
mal_mito_3	cytb	cytb-Tyr268Ser	missense_variant	Tyr268Ser	D10-AG-3	0	0
mal_mito_3	cytb	cytb-Tyr268Ser	missense_variant	Tyr268Ser	D10-AG-4	0	0
mal_mito_3	cytb	cytb-Tyr268Ser	missense_variant	Tyr268Ser	D10-AG-5	0	0
mal_mito_3	cytb	cytb-Tyr268Ser	missense_variant	Tyr268Ser	D10-AG-6	0	0
mal_mito_3	cytb	cytb-Tyr268Ser	missense_variant	Tyr268Ser	D6-AG-1	0	0
mal_mito_3	cytb	cytb-Tyr268Ser	missense_variant	Tyr268Ser	D6-AG-2	0	0
mal_mito_3	cytb	cytb-Tyr268Ser	missense_variant	Tyr268Ser	D6-AG-3	0	0
mal_mito_3	cytb	cytb-Tyr268Ser	missense_variant	Tyr268Ser	D6-AG-4	0	0
mal_mito_3	cytb	cytb-Tyr268Ser	missense_variant	Tyr268Ser	D6-AG-5	0	0
mal_mito_3	cytb	cytb-Tyr268Ser	missense_variant	Tyr268Ser	D6-AG-6	0	0
PF3D7_0810800	dhps	dhps-Ala437Gly	missense_variant	Ala437Gly	D10-AG-1	0.86	0.764912
PF3D7_0810800	dhps	dhps-Ala437Gly	missense_variant	Ala437Gly	D10-AG-2	0.86	0.78626
PF3D7_0810800	dhps	dhps-Ala437Gly	missense_variant	Ala437Gly	D10-AG-3	0.86	0.753112
PF3D7_0810800	dhps	dhps-Ala437Gly	missense_variant	Ala437Gly	D10-AG-4	0.86	0.780769
PF3D7_0810800	dhps	dhps-Ala437Gly	missense_variant	Ala437Gly	D10-AG-5	0.86	0.738007
PF3D7_0810800	dhps	dhps-Ala437Gly	missense_variant	Ala437Gly	D10-AG-6	0.86	0.809339
PF3D7_0810800	dhps	dhps-Ala437Gly	missense_variant	Ala437Gly	D6-AG-1	0.86	0.75
PF3D7_0810800	dhps	dhps-Ala437Gly	missense_variant	Ala437Gly	D6-AG-2	0.86	0.755102
PF3D7_0810800	dhps	dhps-Ala437Gly	missense_variant	Ala437Gly	D6-AG-3	0.86
PF3D7_0810800	dhps	dhps-Ala437Gly	missense_variant	Ala437Gly	D6-AG-4	0.86	0.727273
PF3D7_0810800	dhps	dhps-Ala437Gly	missense_variant	Ala437Gly	D6-AG-5	0.86	0.820513
PF3D7_0810800	dhps	dhps-Ala437Gly	missense_variant	Ala437Gly	D6-AG-6	0.86	0.714286
