# Supplementary material for: Immediate pools of malaria infections at diagnosis combined with targeted deep sequencing accurately quantifies frequency of drug resistance mutations
Source: PeerJ. 2021 Nov 9;9:e11794. doi: 10.7717/peerj.11794 (PMC8588852; doi:10.7717/peerj.11794)
Supplement: Supplemental Information 4 [file peerj-09-11794-s004.xlsx]

## Sheet: Sheet1
Supplementary Table 4. Frequencies of mutations in immediate pools and individuals for known mutations and novel variants in K13
Gene	Mutation Name	ExonicFunc	Targeted	Begoro Genotyped (count)	Cape Coast Genotyped (count)	Begoro Individuals Average Frequency	Begoro Pools Average Frequency	Cape Coast Individuals Average Frequency	Cape Coast Pools Average Frequency	Begoro Prevalence in Individuals (count)	Begoro Prevalence in Pools (count)	Cape Coast Prevalence in Individuals (count)	Cape Coast Prevalence in Pools (count)	Begoro 95% Confidence Lower Bound	Begoro 95% Confidence Upper Bound	Cape Coast 95% Confidence Lower Bound	Cape Coast 95% Confidence Upper Bound	Begoro 95% CI (-)	Begoro 95% CI (+)	Cape Coast 95% CI (-)	Cape Coast 95% CI (+)	Mutation ID	Mutation Position
crt	crt-Cys72Ser	missense_variant	Yes	57	67	0	0	0	0	0	0	0	0	0	0.000571402	0	0.000125137	0	0.000571402	0	0.000125137	Cys72Ser	72
crt	crt-Met74Ile	missense_variant	Yes	57	67	0.0298434	0.0218469	0.169479	0.204261	3	1	19	1	0.0184204	0.0257144	0.199671	0.208909	0.00342654	0.0038675	0.00459005	0.00464841	Met74Ile	74
crt	crt-Asn75Glu	missense_variant	Yes	57	67	0.0298434	0.0218469	0.169479	0.204261	3	1	19	1	0.0184204	0.0257144	0.199671	0.208909	0.00342654	0.0038675	0.00459005	0.00464841	Asn75Glu	75
crt	crt-Lys76Thr	missense_variant	Yes	57	67	0.0298434	0.0218469	0.169479	0.204261	3	1	19	1	0.0184204	0.0257144	0.199671	0.208909	0.00342654	0.0038675	0.00459005	0.00464841	Lys76Thr	76
crt	crt-His97Leu	missense_variant	Yes	57	67	0	0	0	0	0	0	0	0	0	0.000571402	0	0.000125137	0	0.000571402	0	0.000125137	His97Leu	97
crt	crt-His97Tyr	missense_variant	Yes	57	67	0	0	0	0	0	0	0	0	0	0.000571402	0	0.000125137	0	0.000571402	0	0.000125137	His97Tyr	97
crt	crt-Ala220Ser	missense_variant	Yes	48	65	0.0352542	0.0121951	0.158005	0.152971	3	1	16	1	0.00252202	0.0352237	0.139653	0.167039	0.0096731	0.0230286	0.013318	0.0140677	Ala220Ser	220
crt	crt-Asn326Ser	missense_variant	Yes	58	70	0	0	0	0.000292099	0	0	0	1	0	0.00332378	7.95926e-05	0.000747718	0	0.00332378	0.000212506	0.00045562	Asn326Ser	326
crt	crt-Ile356Thr	missense_variant	Yes	59	69	0	0	0.0615491	0.0811909	0	0	7	1	0	0.00328822	0.0766432	0.0859196	0	0.00328822	0.00454773	0.00472871	Ile356Thr	356
cytb	cytb-Met133Ile	missense_variant	Yes	14	39	0	0	0	0	0	0	0	0	0	0.0183663	0	0.00425552	0	0.0183663	0	0.00425552	Met133Ile	133
cytb	cytb-Tyr268Asn	missense_variant	Yes	39	56	0	0	0	0	0	0	0	0	0	0.00470613	0	0.000981648	0	0.00470613	0	0.000981648	Tyr268Asn	268
cytb	cytb-Tyr268Cys	missense_variant	Yes	39	56	0	0	0	0	0	0	0	0	0	0.00470613	0	0.000981648	0	0.00470613	0	0.000981648	Tyr268Cys	268
cytb	cytb-Tyr268Ser	missense_variant	Yes	39	56	0	0	0	0	0	0	0	0	0	0.00470613	0	0.000981648	0	0.00470613	0	0.000981648	Tyr268Ser	268
dhfr-ts	dhfr-ts-Ala16Val	missense_variant	Yes	60	69	0	0	0	0	0	0	0	0	0	0.00191546	0	0.000451027	0	0.00191546	0	0.000451027	Ala16Val	16
dhfr-ts	dhfr-ts-Asn51Ile	missense_variant	Yes	61	69	0.846609	0.720801	0.84719	0.816002	54	1	60	1	0.702167	0.738883	0.808285	0.823535	0.0186342	0.0180813	0.00771693	0.00753335	Asn51Ile	51
dhfr-ts	dhfr-ts-Cys59Arg	missense_variant	Yes	61	69	0.993873	0.998295	0.910658	0.9183	61	1	64	1	0.99564	0.999535	0.912773	0.923584	0.00265472	0.00124028	0.00552721	0.00528333	Cys59Arg	59
dhfr-ts	dhfr-ts-Ser108Asn	missense_variant	Yes	61	69	1	0.99876	0.9396	0.957651	61	1	66	1	0.996381	0.999744	0.953624	0.961422	0.00237886	0.000983947	0.0040269	0.00377072	Ser108Asn	108
dhfr-ts	dhfr-ts-Ser108Thr	missense_variant	Yes	61	69	0	0.000826446	0	0	0	1	0	0	0.000100102	0.00298219	0	0.000350993	0.000726344	0.00215574	0	0.000350993	Ser108Thr	108
dhfr-ts	dhfr-ts-Ile164Leu	missense_variant	Yes	33	45	0	0	0	0	0	0	0	0	0	0.0479951	0	0.00800457	0	0.0479951	0	0.00800457	Ile164Leu	164
dhps	dhps-Ile431Val	missense_variant	Yes	48	65	0	0	0.0073155	0.0260432	0	0	1	1	0	0.00484203	0.0209386	0.0319886	0	0.00484203	0.00510461	0.00594539	Ile431Val	431
dhps	dhps-Ser436Ala	missense_variant	Yes	48	65	0.438556	0.330263	0.276641	0.346552	27	1	26	1	0.296882	0.364968	0.330498	0.362873	0.0333808	0.0347044	0.0160546	0.0163206	Ser436Ala	436
dhps	dhps-Ser436Phe	missense_variant	Yes	48	65	0	0	0	0	0	0	0	0	0	0.00484203	0	0.00109111	0	0.00484203	0	0.00109111	Ser436Phe	436
dhps	dhps-Ala437Gly	missense_variant	Yes	48	65	0.559862	0.669737	0.710112	0.650488	32	1	51	1	0.635032	0.703118	0.634139	0.666577	0.0347044	0.0333808	0.0163498	0.016089	Ala437Gly	437
dhps	dhps-Lys540Glu	missense_variant	Yes	43	55	0.0065407	0	0.0249066	0.00941176	1	0	2	1	0	0.0215912	0.00407184	0.0184603	0	0.0215912	0.00533992	0.00904855	Lys540Glu	540
dhps	dhps-Ala581Gly	missense_variant	Yes	43	55	0.00465116	0	0.00918431	0.0223529	1	0	1	1	0	0.0215912	0.0135103	0.0346875	0	0.0215912	0.00884263	0.0123346	Ala581Gly	581
dhps	dhps-Ala613Ser	missense_variant	Yes	43	55	0.168023	0.147929	0.0512362	0.0294118	10	1	6	1	0.0980767	0.210581	0.0191223	0.0431128	0.0498523	0.0626521	0.0102895	0.013701	Ala613Ser	613
dhps	dhps-Ala613Thr	missense_variant	Yes	43	55	0	0	0	0	0	0	0	0	0	0.0215912	0	0.00433045	0	0.0215912	0	0.00433045	Ala613Thr	613
k13	k13-Gly112Glu	missense_variant	No	49	62	0	0	0.00773411	0.00581525	0	0	3	1	0	0.00435088	0.00380213	0.00850916	0	0.00435088	0.00201312	0.00269391	Gly112Glu	112
k13	k13-Lys114Gln	missense_variant	No	49	62	0	0	0.014977	0.000447327	0	0	1	1	0	0.00435088	5.4178e-05	0.00161496	0	0.00435088	0.000393149	0.00116763	Lys114Gln	114
k13	k13-His136Asn	missense_variant	No	49	62	0	0	0.00676633	0.0205817	0	0	1	1	0	0.00435088	0.0166232	0.0251826	0	0.00435088	0.00395849	0.0046009	His136Asn	136
k13	k13-Asn139_Asn142dup	conservative_inframe_insertion	No	49	62	0.0385212	0.0212766	0	0	2	1	0	0	0.0126574	0.0334184	0	0.000824912	0.00861916	0.0121418	0	0.000824912	Asn139_Asn142dup	139
k13	k13-Asn141_Asn142dup	conservative_inframe_insertion	No	49	62	0.0272368	0.0283688	0.0295857	0.0337808	3	1	4	1	0.0182592	0.0419178	0.0286792	0.0395026	0.0101096	0.013549	0.00510157	0.00572183	Asn141_Asn142dup	141
k13	k13-Asn142del	conservative_inframe_deletion	No	49	62	0.000303215	0.00591017	0.000519169	0.00380313	3	1	6	1	0.00192172	0.0137381	0.00221698	0.00608222	0.00398845	0.0078279	0.00158615	0.00227909	Asn142del	142
k13	k13-Asn142dup	conservative_inframe_insertion	No	49	62	0.00566835	0.00591017	0.00403683	0.00246085	2	1	2	1	0.00192172	0.0137381	0.00122907	0.00439886	0.00398845	0.0078279	0.00123178	0.00193801	Asn142dup	142
k13	k13-Lys189Asn	missense_variant	No	49	62	0.0257656	0.0177305	0.016282	0.00134198	3	1	3	1	0.00995672	0.0290754	0.000492638	0.00291862	0.00777377	0.0113449	0.000849344	0.00157664	Lys189Asn	189
k13	k13-Lys189Thr	missense_variant	No	49	62	0.675946	0.732861	0.685054	0.76068	37	1	51	1	0.701676	0.762413	0.747894	0.773125	0.0311842	0.0295523	0.0127863	0.0124449	Lys189Thr	189
k13	k13-Arg255Lys	missense_variant	No	54	63	0.00585441	0.0153374	0.0110029	0	2	1	1	0	0.00499829	0.0354276	0	0.00399729	0.0103391	0.0200902	0	0.00399729	Arg255Lys	255
k13	k13-Leu258Met	missense_variant	No	54	63	0.0185185	0	0	0.0152009	1	0	0	1	0	0.0112518	0.00833472	0.0253731	0	0.0112518	0.00686615	0.0101722	Leu258Met	258
k13	k13-Met476Ile	missense_variant	Yes	55	67	0	0	0	0	0	0	0	0	0	0.00296332	0	0.000615342	0	0.00296332	0	0.000615342	Met476Ile	476
k13	k13-Tyr493His	missense_variant	Yes	55	67	0	0	0	0	0	0	0	0	0	0.00296094	0	0.000615342	0	0.00296094	0	0.000615342	Tyr493His	493
k13	k13-Arg539Thr	missense_variant	Yes	55	67	0	0	0	0	0	0	0	0	0	0.00296094	0	0.000615342	0	0.00296094	0	0.000615342	Arg539Thr	539
k13	k13-Ile543Thr	missense_variant	Yes	55	67	0	0	0	0	0	0	0	0	0	0.00296094	0	0.000615342	0	0.00296094	0	0.000615342	Ile543Thr	543
k13	k13-Cys580Tyr	missense_variant	Yes	56	68	0	0	0	0	0	0	0	0	0	0.00335705	0	0.000820691	0	0.00335705	0	0.000820691	Cys580Tyr	580
k13	k13-Glu602Asp	missense_variant	No	47	62	0.00324009	0	0	0	1	0	0	0	0	0.00600945	0	0.00154421	0	0.00600945	0	0.00154421	Glu602Asp	602
mdr1	mdr1-Asn86Tyr	missense_variant	Yes	46	62	0.0841374	0.102837	0.0510753	0.0366249	7	1	4	1	0.0790178	0.130908	0.0291014	0.0454385	0.023819	0.0280715	0.0075235	0.00881356	Asn86Tyr	86
mdr1	mdr1-Tyr184Phe	missense_variant	Yes	51	64	0.724639	0.590078	0.603204	0.512802	40	1	45	1	0.554305	0.625155	0.494145	0.531433	0.0357732	0.0350771	0.0186573	0.0186306	Tyr184Phe	184
mdr1	mdr1-Ser1034Cys	missense_variant	Yes	51	65	0	0	0	0	0	0	0	0	0	0.00521879	0	0.00122033	0	0.00521879	0	0.00122033	Ser1034Cys	1034
mdr1	mdr1-Asn1042Asp	missense_variant	Yes	51	65	0	0	0	0	0	0	0	0	0	0.00521879	0	0.00122033	0	0.00521879	0	0.00122033	Asn1042Asp	1042
mdr1	mdr1-Asp1246Tyr	missense_variant	Yes	43	61	0.0232558	0.00737101	0	0	1	1	0	0	0.00152267	0.0213891	0	0.00250459	0.00584834	0.0140181	0	0.00250459	Asp1246Tyr	1246
mdr2	mdr2-Thr484Ile	missense_variant	Yes	41	60	0	0	0	0	0	0	0	0	0	0.0159107	0	0.0030617	0	0.0159107	0	0.0030617	Thr484Ile	484
